# 1 **Plastid Genome Assembly Using Long-read Data (ptGAUL)**

2 Wenbin Zhou<sup>1\*</sup>, Carolina E. Armijos<sup>4</sup>, Chaehee Lee<sup>5</sup>, Ruisen Lu<sup>6</sup>, Jeremy Wang<sup>3</sup>, Tracey A.

3 Ruhlman<sup>7</sup>, Robert K. Jansen<sup>7</sup>, Alan M. Jones<sup>1,2</sup>, Corbin D. Jones<sup>1,3</sup>

4

5 Departments of <sup>1</sup>Biology, <sup>2</sup>Pharmacology, <sup>3</sup>Genetics, University of North Carolina at Chapel

6 Hill, Chapel Hill, NC 27599, USA. <sup>4</sup>Laboratorio de Biotecnología Vegetal, Universidad San

7 Francisco de Quito USFQ, Diego de Robles s/n y Vía Interocéánica, Quito, 170901, Ecuador.

8 <sup>5</sup>Department of Plant Sciences, University of California, Davis, Davis, CA 95616, USA.

9 <sup>6</sup>Institute of Botany, Jiangsu Province and Chinese Academy of Sciences, Nanjing 210014,

10 China. <sup>7</sup>Department of Integrative Biology, University of Texas at Austin, TX 78712, USA.

11

12 \*Corresponding authors e-mail address: [wenbin.evolution@gmail.com](mailto:wenbin.evolution@gmail.com).

13

14 **Abstract**

15 Although plastid genome (plastome) structure is highly conserved across most seed plants,  
16 investigations during the past two decades revealed several disparately related lineages that  
17 experienced substantial rearrangements. Most plastomes contain a large, inverted repeat and  
18 two single-copy regions and few dispersed repeats, however the plastomes of some taxa  
19 harbor long repeat sequences (>300 bp). These long repeats make it difficult to assemble  
20 complete plastomes using short-read data leading to misassemblies and consensus sequences  
21 that have spurious rearrangements. Single-molecule, long-read sequencing has the potential to  
22 overcome these challenges, yet there is no consensus on the most effective method for  
23 accurately assembling plastomes using long-read data. We generated a pipeline, *plastid*  
24 *Genome Assembly Using Long-read data* (ptGAUL), to address the problem of plastome  
25 assembly using long-read data from Oxford Nanopore Technologies (ONT) or Pacific  
26 Biosciences platforms. We demonstrated the efficacy of the ptGAUL pipeline using 16  
27 published long-read datasets. We showed that ptGAUL produces accurate and unbiased  
28 assemblies. Additionally, we employed ptGAUL to assemble four new *Juncus* (Juncaceae)  
29 plastomes using ONT long reads. Our results revealed many long repeats and rearrangements  
30 in *Juncus* plastomes compared with basal lineages of Poales.

31

32 **KEY WORDS**

33 Long-read assembly, chloroplast, rearrangement events, *Juncus*, Juncaceae, Poales

34

35

## 36 1 INTRODUCTION

37 Plastid genomes (plastomes) are highly conserved, comprising linear, branched or  
38 occasionally circular molecules that usually contain a large, inverted repeat (IR) and large and  
39 small single-copy regions (LSC and SSC). Due to their conserved structure and low rate of  
40 nucleotide substitution, plastome data has made substantial contributions to phylogenetic  
41 studies for many plant groups (Jansen & Ruhlman, 2012; Jiang et al., 2022; Liu et al., 2022;  
42 Xia et al., 2022; Xu et al., 2022; Yu et al., 2022). Despite the high level of plastome structural  
43 conservation in seed plants, rearrangements, including inversions, expansion and contraction  
44 of the IR, and IR loss occurred in unrelated lineages of gymnosperms and angiosperms  
45 (Ruhlman & Jansen, 2021). Many of these same lineages experienced substantial gene loss  
46 with most of these genes functionally transferred to the nuclear genome or substituted by an  
47 alternative, nuclear-encoded gene (Ruhlman & Jansen, 2021). Documented  
48 transferred/substituted genes include *accD*, *infA*, *rpl22*, *rpl20*, *rpl32*, *rpl23*, *rps7*, *rps16*, *ycf1*  
49 and *ycf2*.

50 Genome assembly methods have improved substantially over the past decade  
51 (Twyford & Ness, 2017; Freudenthal et al., 2020). NOVOPlasty (Dierckxsens et al., 2017)  
52 and GetOrganelle (Jin et al., 2020) are the two most frequently used pipelines for plastome  
53 assembly based on Illumina short reads. However these assemblers, which rely on the De  
54 Bruijn graph approach (Compeau et al., 2011), do not always yield accurate assembly results  
55 when confronted with long repeat regions in plastomes, particularly when those repeats are  
56 longer than kmer sizes. In some cases, these tools generate outputs with multiple  
57 contigs/scaffolds or hundreds of possible assembly results. The high number of uncertain  
58 paths can sometimes be corrected using Bandage (Wick et al., 2015), a software tool that  
59 visualizes the depth of read coverage for each contig/scaffold and orders contigs, but the final

60 arrangement of the contigs is often not well-resolved because the Illumina short reads are  
61 insufficient to bridge the repeated sequences and their flanking regions. Using short reads  
62 with a typical insert size (300-400 bp) is insufficient to obtain a complete plastome assembly  
63 for plant species that have large repeats and may be highly rearranged. So far, few plant  
64 systematists have recognized this as an issue likely because most plants possess relatively  
65 conservative plastome structures with limited repeated sequences and because their primary  
66 interest is the extraction of coding sequences for phylogenetic analyses. Long reads generated  
67 by third-generation sequencing methods such as Oxford Nanopore Technologies (ONT) or  
68 Pacific Biosciences (Pacbio) platforms may help resolve assembly issues as the longer reads  
69 are more likely to span long repeats (Liao et al., 2021).

70 To date, many tools have been developed to assemble organelle genomes using long-  
71 read data and hybrid data (both short- and long-read data), including Organelle\_PBA (Soorni  
72 et al., 2017), Canu (Koren et al., 2017), Unicycler (Wick et al., 2017), and Flye (Kolmogorov  
73 et al., 2019; Syme et al., 2021). However, these pipelines for plastome assembly using long-  
74 read or hybrid data have some drawbacks. Organelle\_PBA was designed exclusively for  
75 PacBio data; the Sprai (Miyamoto et al., 2014) and Celera (Miller et al., 2008) assemblers in  
76 Organelle\_PBA are no longer maintained limiting its extension to assembly with hybrid  
77 datasets. The approach of Syme et al. (2021) requires an extra step to manually filter a subset  
78 of raw reads matching the plastome (~250X coverage) and sometimes generates multiple  
79 contigs in the assembly result. Canu can generate different results depending on different read  
80 coverages (Wang et al., 2018). Unicycler was designed for hybrid data, however it takes an  
81 extremely long time to finish as input data is increased. All pipelines can likely assemble the  
82 conventional plastome, but are not able to assemble atypical plastome structures accurately.

83           The angiosperm family Juncaceae contains ~500 species within the seven genera  
84 *Juncus* L., *Luzula* DC., *Distichia* Nees and Meyen, *Oxychloe* Philippi, *Patosia* Buchenau,  
85 *Marsippospermum* Desv. and *Rostkovia* Desv. (Drábková, 2010). *Juncus* is the largest genus  
86 and includes ~300 species (Balslev, 2018) and two major subgenera, *Agathryon* and *Juncus*  
87 (Drábková et al., 2006; Drábková, 2010). Although many species of Juncaceae have been  
88 included in phylogenetic studies using plastid gene sequences and the internal transcribed  
89 spacer region of the nuclear ribosomal repeat (Table S1; Drábková et al., 2006; Drábková,  
90 2010; Brožová et al., 2022), species relationships within *Juncus* remain unresolved. Recently,  
91 Brožová et al. (2022) incorporated *rbcL*, *trnL*, *trnL-trnF*, and ITS1-5.8-ITS2 region to  
92 reorganize *Juncus* into seven distinct genera: *Juncus*, *Verojuncus*, *Juncinella*, *Alpinojuncus*,  
93 *Australojuncus*, *Boreojuncus*, and *Agathryon*.

94           Not many plastome structures have been reported for *Juncus* (*s.l.*). To avoid the  
95 confusion regarding the species names, we did not adopt these latest genera above in our  
96 study because a more comprehensive study with more markers is necessary to justify this  
97 reranking. So far, the plastome structures are seldom studied in *Juncus* (*s.l.*). Plastomes of just  
98 eight *Juncus* species are publicly available in Genbank (Wu et al., 2021; Lu et al., 2021). For  
99 example, the focus of Wu et al. (2021) was phylogenetic relationships in the Poales using  
100 shared, plastid protein-coding genes and no information was reported on plastome structure.  
101 Lu et al., (2021) assembled the plastome of *Juncus effusus* using Velvet (Zerbino, 2010) and  
102 NOVOPlasty (Dierckxsens et al., 2017) with GapFiller (Nadalin et al., 2012) without any  
103 confirmation by either long range PCR or long-read data leaving the final structure uncertain.  
104 Recently, two more *Juncus* (*J. effusus* and *J. inflexus*) nuclear genomes were assembled by  
105 Planta et al. (2022), but no plastomes were reported. Adding more complete plastomes of

106 Juncaceae would allow insight into plastome evolution in the family and help gain more  
107 phylogenetic insights within Juncaceae and Poales.

108 To assist in assembling potentially complex plastomes and to explore structural  
109 variation in *Juncus*, we created a pipeline, *plastid Genome Assembly Using Long-read data*  
110 (ptGAUL), which assembles plastomes using raw ONT long-read sequencing data. The aims  
111 of the study were: 1) test the reliability of the ptGAUL pipeline using 16 published plastomes;  
112 2) employ the pipeline to assemble plastomes of two *Juncus* species (*J. validus* and *J.*  
113 *roemerianus*) sequenced in our study, and assemble two other species (*J. effusus* and *J.*  
114 *inflexus*) from the reads of Planta et al. (2022); and 3) compare plastome evolution in *Juncus*  
115 to selected members of the Poales.

116

## 117 **2 MATERIALS AND METHODS**

### 118 **2.1 *Juncus* sample collection and DNA extraction**

119 Young leaves of *Juncus roemerianus* (voucher number: NCU00441655) and *Juncus validus*  
120 (voucher number: NCU00434802) were collected from North Carolina, USA and stored in  
121 silica gel. Vouchers were deposited in the herbarium of University of North Carolina at  
122 Chapel Hill (NCU). Total genomic DNA extraction of dried leaves was performed using a  
123 modified cetyltrimethylammonium bromide (CTAB) protocol described by Cullings (1992)  
124 and Xiang et al. (1998). DNA quantity was analyzed with Qubit 2.0 (Life Technologies, USA)  
125 and quality was measured using a NanoDrop spectrophotometer 2000 (ThermoFisher  
126 Scientific, USA) and 1% w/v agarose gels. Sequencing was performed at the High-  
127 Throughput Sequencing Facility (HTSF) at UNC Chapel Hill. For Illumina sequence libraries  
128 (Illumina, CA, USA), ~250 ng of total DNA was utilized. Agilent 2100 Bioanalyzer (Agilent  
129 Technologies, USA) was used to select ~450 bp fragments for Novaseq 6000, 250 bp paired-

130 end (PE) sequencing. For the Oxford Nanopore sequencing, ~2000 ng of high-molecular  
131 weight DNA was prepared using the ligation sequencing kit (SQK-LSK109) and sequenced  
132 on two R9.4.1 flowcells (Oxford Nanopore Technologies, Oxford, UK).

133

## 134 **2.2 ptGAUL pipeline and validation**

135 We generated a pipeline to facilitate plastome assembly using long-read data, which can be  
136 applied to both PacBio and ONT raw reads. The ptGAUL pipeline (Figure 1) includes three  
137 major parts: filtering long reads, setting the depth of coverage, and assembling the filtered  
138 plastid data. Step 1: use minimap2 (Li et al., 2018) to find all reads that map partially or  
139 completely to the closely related reference plastome, followed by filtering all reads using a  
140 customized bash script. Then, use seqkit (Shen et al., 2016) to keep long reads greater than a  
141 specified length (default is 3000 bp, “-f” in ptGAUL). Step 2: calculate the coverage by  
142 assembly-stats (available in <https://github.com/sanger-pathogens/assembly-stats>). If the  
143 coverage is over 50x, apply seqtk (available in <https://github.com/lh3/seqtk>) to randomly  
144 select a subset of data including about 50x coverage of the plastome (higher coverage might  
145 fail in assembly). Step 3: use Flye (Kolmogorov et al., 2019) to assemble the plastome. When  
146 only three contigs were detected in the graphical fragment assembly (gfa) file, we used  
147 combined\_gfa.py, a customized python script, to assemble the plastome into two different  
148 paths. Otherwise, the assembly result was checked manually using Bandage. All pipeline code  
149 was deposited on Github (<https://github.com/Bean061/ptgaul>). Step 3: if ptGAUL was  
150 different from the assembly coverage setting in Flye (--asm-coverage), ptGAUL implements  
151 seqtk to randomly choose a subset of long reads to minimize the bias of read selection. After  
152 assembly, if short-read sequencing data are available, the FM-index Long Read Corrector  
153 (FMLRC) software (Wang et al., 2018) is recommended to polish and improve the accuracy

154 of the final assembled sequences because it can generate more accurate assembly result (Mak  
155 et al., 2022). All analyses related to ptGAUL were run using 10 CPUs and 40G RAM on the  
156 longleaf cluster at UNC Chapel Hill.

157 Long-read data from 16 published plastomes in NCBI were used to validate the  
158 efficacy of ptGAUL for assembly (Table 1). Comparative analyses were conducted including  
159 the number of assembled contigs, total genome size (bp) and nucleotide sequence identity  
160 between the published results and those obtained with ptGAUL (pairwise identity in  
161 alignment) using Geneious v.2022.2 (Kearse et al., 2012).

162

### 163 **2.3 Assembly and comparison of four *Juncus* species**

164 The Illumina Novaseq 6000 platform (Illumina, USA) was used to generate 250 bp, paired-  
165 end (PE) reads for *Juncus roemerianus* and *J. validus*. Reads were *de novo* assembled using  
166 GetOrganelle v1.7.5 (Jin et al., 2020) with default settings. Long-read data were also  
167 generated using ONT for *J. roemerianus* and *J. validus*. Long-read data were assembled using  
168 ptGAUL with default (3000 bp) filtering parameters (“-f”) and using all eight *Juncus*  
169 plastomes on GenBank (Table 2) as references for the filtering step. We verified the assembly  
170 graph results (gfa file) from Flye using the visualization in Bandage v 0.8.1 (Wick et al.,  
171 2015). Then, we conducted FMLRC to polish the final plastomes (an optional step in the  
172 ptGAUL pipeline). To examine the assembly result, we mapped all raw Illumina reads and  
173 raw ONT reads of each *Juncus* species to our polished assembly and tested the evenness of  
174 the coverage at all sites. If every site shares a similar coverage of raw reads without gaps in  
175 coverage, this usually indicates a good *de novo* assembly result. We used the samtools v.1.9  
176 (Danecek et al., 2021) depth function to record read depth at every site, followed by a dot plot  
177 created by the matplotlib library (Hunter, 2007) in python. We downloaded the raw whole



178 genome sequencing data of *J. effusus* and *J. inflexus* (both ONT reads: SRR14298760 and  
179 SRR14298751 and Illumina reads: SRR14298746 and SRR14298745 from Planta et al., 2022)  
180 to assemble the plastomes following the same steps above.

181 After assembly, we uploaded plastomes of four *Juncus* species (*J. roemerianus*, *J.*  
182 *validus*, *J. effusus*, and *J. inflexus*) to GeSeq online (Tillich et al., 2017) for annotation using  
183 Chole (Zhong, 2020), HMMER (Finn et al., 2011) and BLAT (Kent, 2002). We manually  
184 checked the start and stop codons of each annotated gene using Geneious v.2022.2. The genes  
185 not in frame in each *Juncus* species were either adjusted or removed after a careful  
186 comparison with *Typha latifolia* plastid annotation (NC\_013823; Guisinger et al., 2010) by  
187 mapping the annotations to our *Juncus* assemblies. For the uncertain tRNAs, we confirmed  
188 the tRNA secondary structures via RNAfold WebServer (Hofacker, 2003). Linear plastome  
189 maps were drawn with OGDRAW v. 1.2 (Lohse et al., 2013). Circular representations were  
190 drawn using Circoletto (Darzentas, 2010) to visualize the repeats.

191

## 192 **2.4 Examination of repeats and rearrangement events in *Juncus***

193 We removed one copy of the IR region prior to repeat analyses to avoid counting the repeats  
194 from IR region. We implemented BLAST v.2.8.1+ (Altschul et al., 1990) and Tandem  
195 Repeats finder v4.09.1 (Benson, 1999) to detect the dispersed repeats and tandem repeats,  
196 respectively, following the steps from Lee et al. (2020). We manually checked the result and  
197 eliminated duplicated blast hits and recorded the total number of distinct dispersed repeats.

198 We also downloaded complete plastomes of *Eriocaulon decemflorum* (NC\_044895;  
199 Darshetkar et al., 2019) and two early diverging Poales, *Typha latifolia* (NC\_013823;  
200 Guisinger et al., 2010) and *Ananas comosus* (NC\_026220; Nashima et al., 2015), for  
201 comparison. All the plots were drawn using matplotlib (Hunter, 2007) in python.

202 We focused on the four confirmed assemblies of *Juncus*, i.e., *J. roemerianus*, *J.*  
203 *validus*, *J. effusus*, and *J. inflexus* for characterizing and comparing the rearrangements in  
204 *Juncus* plastomes. The other eight publicly available (Lu et al., 2021; Wu et al., 2021) *Juncus*  
205 plastomes on GenBank were excluded from the rearrangement analyses (Table 2) because of  
206 the uncertain assemblies resulting from short-read data. To eliminate uncertainty in short-read  
207 assemblies, we compared them to the *J. effusus* plastome assembled from short-read data (Lu  
208 et al., 2021) and to the ptGAUL-assembled plastome of *J. effusus* from long-read data (Planta  
209 et al. 2022). To detect rearrangement events within *Juncus*, whole-genome alignments of *J.*  
210 *roemerianus*, *J. validus*, *J. effusus*, and *J. inflexus* were performed to examine the  
211 arrangement of locally colinear blocks (LCBs) using progressiveMauve (Darling et al., 2004).  
212 One copy of the IR was removed from plastomes prior to Mauve alignment to prevent  
213 spurious alignments. *Typha latifolia* was employed as a reference and *Ananas comosus* and  
214 *Eriocaulon decemflorum* were also included.

215

## 216 **3 RESULTS**

### 217 **3.1 Validation of ptGAUL**

218 Overall, ptGAUL assemblies were successful; assemblies contained either one or three  
219 contigs in 11 of 16 the species, with plastome sizes similar to those reported previously  
220 (indicated with “S” in Table 1). The assembly graph results (gfa files) indicating plastome  
221 structure were visualized and confirmed by Bandage and deposited in Github  
222 (<https://github.com/Bean061/ptgaul>). Assembled plastomes had > 95% nucleotide sequence  
223 identity to the references, however the plastome of *Arctostaphylos glauca* was 31,578 bp  
224 longer (21% total length) than the published data (Table 1). ptGAUL failed to assemble  
225 plastomes of five species (indicated with F in Table 1). The ptGAUL pipeline produced

226 consistent and reliable results when provided with a dataset of long reads (> 5000 bp N50)  
227 with ~50X coverage of the plastome.

228 Our results indicated that different library preparations affected plastome assembly,  
229 regardless of the long-read sequencing platform (PacBio or ONT) employed (Table 1).  
230 Plastomes derived from a whole genomic sequencing approach assembled correctly (either  
231 one or three contigs), with a reasonable plastome length and structure (by Bandage), while the  
232 plastomes using plastid capture approaches (i.e., long range PCR and long fragment target  
233 capture) were more fragmented and had a smaller genome size. For example, *Leucanthemum*  
234 *vulgare* had a similar N50 value to *Lepidium sativum* (7900 bp and 7277 bp, respectively), but  
235 the *Leucanthemum vulgare* library prepared using long range PCR failed in plastome  
236 assembly. All five failed datasets involved the plastid capture approach and most of the raw  
237 sequence reads had relatively short length with small N50 values (less than 5000 bp) (Table  
238 1).

239

### 240 **3.2 Plastome features of four *Juncus* species**

241 We generated 158,922,322 and 156,712,430 short reads for *Juncus roemerianus* and *J.*  
242 *validus*, respectively along with 427,549 ONT reads from *J. roemerianus* (N50 value: 15,998  
243 bp) and 243,884 ONT reads from *J. validus* (N50 value: 14,365) (Table 2). The data were  
244 deposited at NCBI with BioProject accession: PRJNA865266. We also downloaded sequence  
245 data (PRJNA723756) of *J. effusus* and *J. inflexus* from Planta et al. (2022) (Table 2). The  
246 ptGAUL pipeline produced three contigs each for *J. validus* and *J. roemerianus* (Figure S1a,  
247 b) sequenced in this study, and one contig each for *J. effusus* and *J. inflexus* sequenced by  
248 Planta et al. (2022) (Figure S1c, d). The final assembled plastomes of *J. validus*, *J.*

249 *roemerianus*, *J. effusus*, and *J. inflexus* ranged from 147,183 to 196,852 bp, had similar sized  
250 LSCs from, different sizes of the SSC from, and large differences in IR size (Table 2).

251 The assemblies for the four *Juncus* species were verified by mapping both Illumina  
252 and ONT reads back to the assembly. All mapping results showed a high and even coverage  
253 of both species (Figure 2 c-f; Figure S2 a,b,d,e). There were no gaps in assemblies regardless  
254 of sequencing platform. Annotation of the four *Juncus* plastomes revealed that they contained  
255 114 to 136 genes, 93 to 106 of which were unique. There were 60 to 72 unique protein coding  
256 genes (PCGs), 29-30 tRNA genes, and four rRNA genes (Table 2). *Juncus roemerianus* has  
257 the greatest gene number at 136, which is similar to the *J. effusus* (133), *J. inflexus* (134), and  
258 basal Poales ancestors *Typha latifolia* (133), *Ananas comosus* (132), *Eriocaulon decemflorum*  
259 (135) (Table S2). *Juncus effusus* and *J. inflexus* shared a highly similar gene content while *J.*  
260 *validus* lacks 11 *ndh* genes, *rps15* and *trnT-GGU* (Table S2). (Figure S3; Table S2) .

261

### 262 **3.3 Verification of published *Juncus effusus* plastome**

263 We compared the *J. effusus* published assembly based on short-read data (Lu et al., 2021,  
264 MW366789) with our new assembly using ptGAUL of long-read data of Planta et al. (2022).  
265 The result indicated that the short-read assembly generated by Lu et al. was >7.5 kb shorter  
266 than our long-read assembly (170,612 bp versus 178,158 bp). The mapping results showed  
267 that our assembly was well supported by both long-read and short-read data from Planta et al.  
268 (2022) (Figure S2a,b), yet unsupported by the Illumina reads from Lu et al. (2021) with 777  
269 positions with less than 10x coverage, including 295 positions that have no read coverage  
270 (Figure S2c). The previous short-read assembly of *J. effusus* (MW366789) was not supported  
271 by the long-read data from Planta et al. (2022). Based on this result, we removed the eight

272 publicly available *Juncus* plastomes assembled with short-read data prior to the comparative  
273 analyses of plastomes.

274

### 275 **3.4 Repeats in *Juncus* plastomes**

276 Repeat analyses identified many dispersed and tandem repeats in the four *Juncus* plastomes  
277 (17.2 – 24.3 % of genome without IRa) in comparison with basal Poales and *Eriocaulon* (1.8  
278 – 3.3 % of genome without IRa) (Table 3). The combined length of both dispersed and  
279 tandem repeats in *Juncus* plastomes ranged from 22,577 bp (*J. validus*) to 34,027 bp (*J.*  
280 *roemerianus*), which was far greater than *Typha* (4,436 bp), *Ananas* (3,552 bp) and  
281 *Eriocaulon* (2,227 bp) (Table 3). When dispersed repeats were parsed into five different size  
282 classes, *Juncus* plastomes contained a greatly increased number of dispersed repeats than  
283 basal Poales and *Eriocaulon* (Figure 3 and Table S3). Larger repeats (>201 bp) were found  
284 only in *Juncus* (Figure 3 and Table S3). Among four *Juncus* plastomes, *J. effusus* and *J.*  
285 *validus* had more abundant dispersed repeats yet *J. roemerianus* was the only one with a  
286 repeat larger than 1 kb. *Juncus* plastomes also experienced substantial accumulation of  
287 tandem repeats (Table 3). Tandem repeat accumulation was higher than that of dispersed  
288 repeats in *J. inflexus* and *J. roemerianus*. All four *Juncus* plastomes contained exceptionally  
289 expanded tandem repeats, ranging from 4.6 – 6.6 kb, some of which contain *clpP* (Table S4).

290

### 291 **3.5 Rearrangement of *Juncus* plastomes**

292 Whole-genome alignment using progressiveMauve (Figure 4) detected 27 LCBs from seven  
293 complete plastomes (*Typha latifolia*, *Ananas comosus*, *Eriocaulon decemflorum*, *Juncus*  
294 *effusus*, *J. inflexus*, *J. roemerianus*, and *J. validus*). The plastomes of the two basal Poales and  
295 *Eriocaulon* were colinear, whereas all *Juncus* species have many breakpoints (BP) relative to

296 the reference, *T. latifolia* (Figure 4; Table 4). When compared with basal Poales plastomes,  
297 the BP and reversal distances were 15 and 19, in *J. effusus* and *J. inflexus*, respectively.  
298 *Juncus roemerianus* has the largest BP (17) and reversal distances (20), and *J. validus* has the  
299 smallest BP (14) and reversal distances (17). Among the four *Juncus*, 27 LCBs were  
300 identified (Figure S4). While *J. effusus* and *J. inflexus* shared the same gene order, widespread  
301 rearrangements were detected in the other two species (*J. roemerianus* and *J. validus*).

302

## 303 **4 DISCUSSION**

### 304 **4.1 ptGAUL application and suggestions for sequencing approach**

305 The ptGAUL pipeline generated either one or three contig(s) for 11 publicly available  
306 datasets using either PacBio or Oxford Nanopore data (Table 1). However, it failed to  
307 assemble the data from five species generating more than three short contigs and predicted  
308 much smaller plastome size, which is less than optimal (Table 1). In successful cases, the  
309 assemblies were highly similar to the published short-read assemblies with over 96-99%  
310 nucleotide sequence identity. The lower percent identity between *Cenchrus americanus* and  
311 *Digitaria exilis* and their reference assemblies may be due to different sequencing approaches  
312 between the Mariac et al. (2014) combined plastid capture method and Illumina sequencing  
313 and our long-read approach. For *Arctostaphylos glauca*, we used the read mapping method to  
314 verify that our assembly was more reliable than the result of Huang et al. (2022) as it showed  
315 more proportional coverage across the entire plastome (Figure S5). This difference could be  
316 caused by the selection of a distantly-related reference genome (*Camellia taliensis*) from  
317 another family by Huang et al. (2022).

318 We found that the five failed samples had some features in common. For example, the  
319 sequencing approaches in failed assemblies were different from the whole genomic

320 sequencing method of those that were successful. In the *Leucanthemum vulgare* study, long-  
321 range PCR was implemented to generate amplicons that were then sequenced to produce a set  
322 of long reads that had an N50 value of ~ 8000 bp (Scheunert et al., 2020). In the remaining  
323 failed assemblies, plastid capture was utilized (Bethune et al., 2019). The PCR processes in  
324 both studies can greatly increase the bias among different plastome regions, e.g. AT- and GC-  
325 rich regions do not amplify as efficiently as other regions (Quail et al., 2012). This could lead  
326 to underrepresentation/unevenness in read coverage of different regions resulting in many  
327 fragmented assemblies/contigs. Furthermore, the probes were designed based on the plastome  
328 data from distantly related species (Bethune et al., 2019), which may be unable to capture all  
329 plastome fragments for the target non-model species due to the divergence between the probe  
330 regions and the genome being captured. Additionally, the sequences obtained from PCR  
331 methods tend to be much shorter than the reads generated from sequencing total genomic  
332 DNA (see N50 values in Table 1). The low N50 values could also result from degraded DNA  
333 from poor storage, use of silica dried or herbarium material and/or DNA extraction method.  
334 For example, the Qiagen DNEasy Plant kits can generate high quality DNA for short-read  
335 sequences because the column shreds the DNA to a maximum of ~25 Kb fragments (Qiagen,  
336 2006). CTAB, SDS or other methods that can produce much higher molecular weight (HMW)  
337 DNA are preferred for third generation sequencing (Mayjonade et al., 2016; Jung et al., 2019),  
338 emphasizing the importance of sample preparation. Likewise, the assembly approaches,  
339 parameter combinations, read coverage, and the presence of nuclear genome and/or  
340 mitogenome contaminants could impact the completeness of an assembly (Jung et al., 2019;  
341 Scheunert et al., 2020).

342 Overall, considering the read length and read coverage, ptGAUL performs well for  
343 HMW samples using total genomic sequencing resulting in high N50 values. Therefore, we

344 recommend using HMW DNA extraction methods to isolate highly intact DNA, followed by  
345 long-read sequencing and subsequent assembly using ptGAUL.

346

#### 347 **4.2 Long-read data for plastome assembly**

348 We found that short-read data alone may be insufficient to accurately assemble plastomes in  
349 species with many long dispersed repeats. This phenomenon has been seen in several lineages  
350 including *Eleocharis* (Lee et al., 2020) and *Monsonia* (Ruhlman et al., 2017). Plastome  
351 assembly using GetOrganelle for 11 *Juncus* species (12 accessions) failed using Illumina  
352 short reads only, including two samples in this study (Fig. S6). All *Juncus* plastome  
353 assemblies indicated either many fragmented contigs or many assembly paths (Figure S6).

354 This is because the many long dispersed repeats in *Juncus* plastomes are longer than the kmer  
355 size/length of short reads. Based on our *J. effusus* plastome comparison, the final assembly  
356 length and total number of genes based on short read data is much shorter than the ones  
357 assembled from long read data (Table 2, Table S2), which might be caused by the random  
358 selection one of the paths as the final assembly when using short read data. Other studies  
359 demonstrated that this issue can be resolved by a three-step approach: comparing different  
360 contigs from short-read assemblers (e.g. SPADES, Velvet), manually checking through the  
361 contigs compared with closely related species, and long range PCR to confirm assemblies  
362 (Lee et al., 2020; Ruhlman et al., 2017). This approach requires considerable time and effort.

363 Our ONT data resolved the plastome structure of four *Juncus*, confirming prior work  
364 (Lee et al., 2020; Ruhlman et al., 2017) showing that long-read data vastly improves assembly  
365 of the plastomes with many long repeats. Based on our study and that of Scheunert et al.  
366 (2020) ~50X mapping coverage of long-read data can result in an accurate plastome assembly.  
367 In our study, long reads of plastid origin represented 5%-6% of reads generated from total



368 genomic DNA of *Juncus*. Assuming 5% plastid DNA content from whole-genome HMW  
369 extractions, to generate ~ 50X coverage of a 160,000 bp plastome requires only ~160 Mbp  
370 reads per sample. Currently one chip of ONT generates ~10 Gbp of sequence data, enabling  
371 multiplexing up to 64 samples at a consumables cost of ~\$1000 USD (based on the price from  
372 HTSF at UNC Chapel Hill).

373         Although several assembly tools have been developed, several issues persist. Some  
374 pipelines/software are no longer maintained (i.e., Sprai, Celera Assembler, Organelle\_PBA).  
375 The assemblers of Syme et al. (2021); others, Canu, and Hinge (Wang et al., 2018) cannot  
376 generate a consistent plastome assembly result with one contig when using different  
377 coverages of data. Unicycler (Wick et al., 2017) is computationally intensive and does not  
378 produce well resolved assemblies when dealing with complicated plastomes with many long  
379 repeats. Compared to current published pipelines for plastome assembly, ptGAUL can help  
380 generate an accurate plastome assemblies in less than ~20 minutes (10 CPUs and 40G RAM),  
381 making it highly convenient. Thus, ptGAUL should greatly facilitate plastome assembly of  
382 long-read data for phylogenetic and molecular evolutionary studies, especially in plastomes  
383 with a significant fraction of long repeat regions. Although ptGAUL can expedite plastome  
384 assembly, researchers still need to pay close attention to the species with multiple plastid  
385 types, such as *Eleocharis* (Lee et al., 2020) and *Monsonia* (Ruhlman et al., 2017).

386

### 387 **4.3 *Juncus* plastome organization**

388         While many Poales genera contain plastomes with conserved gene order and content  
389 (Jones et al., 2007), including *Typha* (Guisinger et al., 2010), *Ananas* (Redwan et al., 2015)  
390 and *Eriocaulon* (Darshetkar et al., 2019), the data from the four *Juncus* examined here  
391 suggest that at least some species in this group contain plastome features atypical to most

392 angiosperms. A limited number of complete plastome sequences are available from *Juncus* or  
393 other Juncaceae, but recently assemblies of two *Eleocharis* plastomes, in the sister family  
394 Cyperaceae (Hochbach et al., 2018), revealed accumulated duplications, gene losses, gene  
395 order rearrangements and intraindividual structural heteroplasmy (Lee et al., 2020). Similar  
396 phenomena contributed to size variation in the four *Juncus* plastomes, which ranged from  
397 147,183 bp to 196,852 bp (Table 2). Many long repeats, including an unusually high number  
398 of dispersed repeats of 61 – 200 bp and 201 – 1000 bp, were present in the four *Juncus* with  
399 the greatest accumulation in *J. effusus*. Repeats >1000 bp were detected only in *J.*  
400 *roemerianus* (Table S3; Figure 3). Accumulation of large repeats may predispose plastome  
401 rearrangements in addition to contributing to overall size expansion (Tables 2-3, Figure 4) yet  
402 at present it is not clear if repeat accumulation predicated rearrangement or *vice versa* (Lee et  
403 al., 2021).

404         Similar repeat accumulation and plastome rearrangement occur in other taxonomic  
405 groups. In the *Trachelium caeruleum*, there are gene-order changes, along with gene  
406 duplication, pseudogenization and loss were identified, as well as an abundance of variously  
407 sized repeats (Haberle et al., 2008). A relationship between repeat accumulation and  
408 rearrangement was suggested (Kim & Lee, 2005); studies of *Pelargonium* (Chumley et al.,  
409 2006), *Jasminum*, *Mendora* (Lee et al., 2007) and *Trifolium* (Cai et al., 2008) plastomes show  
410 early support for the theory. Many of the repeated sequences, when plotted onto the  
411 assembled plastid chromosomes, clustered at rearrangement endpoints. The relationship is  
412 also supported by findings in bacterial genomes where repeated sequences lead to gene order  
413 rearrangements (Rocha, 2003). Reconfiguration of the ancestral angiosperm plastome through  
414 repeat-mediated recombination has now been reported in several groups (Sloan et al., 2014;  
415 Weng et al., 2014; Schwarz et al., 2015; Ruhlman et al., 2017; Choi et al., 2019; Choi et al.,

416 2020). The recombinogenic potential of long repeats identified in the *Juncus* plastomes was  
417 likely involved in diversifying gene order.

418 The observation of slight variations in IR length between *Nicotiana* species was  
419 explored in seminal work that focused on the IR/LSC boundary in closely related groups. This  
420 work ultimately inferred recombination-mediated gene conversion between poly-A tracts that  
421 gave rise to a >12 kb expansion at the *N. acuminata* J<sub>LB</sub> (IR<sub>B</sub>/LSC boundary) placing the new  
422 J<sub>LB</sub> near *clpP* and duplicating the 12 kb sequence now included in the IR (Goulding et al.,  
423 1996). Although the details of the mechanism have been clarified and refined over the years,  
424 repeat-mediated gene conversion appears to be at the heart of it (Maréchal & Brisson, 2010;  
425 Oldenburg & Bendich, 2015; Ruhlman & Jansen, 2021).

426 Plastomes that contain a large number of long repeats can experience extensive  
427 rearrangement of gene order and both loss and gain of plastome sequence, including genes,  
428 introns and non-coding sequences alike. Expansion and contraction at both LSC and SSC  
429 boundaries contributed to variation in *Juncus* plastome size. Photosynthetic seed plant  
430 plastomes and IRs range from ~120-170 kb and 20-30 kb, respectively, however most IR-  
431 containing angiosperms sequenced to date display highly similar gene arrangement and  
432 plastome size (~150 kb; IR, ~25kb; Ruhlman & Jansen, 2021). Total plastome size in some  
433 groups is strongly influenced by IR expansion, yet in other lineages the association is loose at  
434 best. For example, a study of five *Cyperus* plastomes revealed the largest plastomes had the  
435 smaller IRs (i.e. *C. esculentus*; 186,255 kb/37,438 kb) and the smaller plastomes contained  
436 the larger IRs (i.e. *C. difformis*; 167,974 kb/38,427 kb) (Ren et al., 2021).

437 While total plastome size scaled with IR size (Table 2) and total repeat content (Table  
438 3) in the four *Juncus*, the myriad events that altered each plastome relative to a shared  
439 ancestor with more conserved structure remain elusive. The smallest of the four plastomes, in

440 *J. validus* would seem like a typical plastome based on the overall plastome and IR size (~147  
441 kb and ~29 kb). However, the assembly and annotation show that it is not always size that  
442 matters. This plastome has likely experienced/is experiencing an ongoing series of IR boundary  
443 migrations resulting in a novel organization relative to the other taxa evaluated here. The near  
444 total elimination of the NDH gene suite, predominantly situated in the SSC in typical  
445 angiosperm plastomes, was unique to *J. validus* and suggests that IR boundary migration into  
446 the SSC played a role in their eventual loss. Although retained by the three other taxa, NDH  
447 sequences appear in alternate loci and several have been duplicated by IR inclusion (Figure 2;  
448 Figure S3) suggesting migration at the SSC boundaries. Indeed, the gene order arrangement  
449 proximal to IR/LSC boundaries display little rearrangement across all four *Juncus* (Figures 2,  
450 3; Figure S3).

451 Complete ablation of the plastid-encoded NDH (NADH dehydrogenase-like) gene  
452 suite was reported for several unrelated seed plant lineages (Ruhlman et al., 2015). The NDH  
453 complex of plant and algal plastids participates in cyclic electron flow (CEF) (Shikanai et al.,  
454 1998) and comprises a multisubunit, plastid-localized complex that incorporates imported  
455 nuclear-encoded factors. The plastid genes encoding the NDH complex are highly conserved  
456 across Streptophyta (Hori et al., 2014) suggesting an essential function in photosynthesis  
457 (Ifuku et al., 2011). Using plastome sequencing and nuclear transcriptomics revealed that taxa  
458 lacking the plastid genes encoding constituents of NDH concomitantly lacked the relevant  
459 nuclear-encoded factors. Probing nuclear transcriptomes revealed that regardless of the state  
460 of the plastid NDH gene suite, genes encoding the alternate PGR5-dependent CEF pathway  
461 (Shikanai, 2014) were present in the nucleus of all examined taxa (Ruhlman et al., 2015). The  
462 loss of the NDH suite from the *J. validus* plastome is unique among examined Poales

463 plastomes and suggest that an active PGR5-dependent pathway accounts for CEF in this  
464 species.

465         Apart from the loss of NDH genes, gene losses were shared by all four *Juncus*  
466 examined and included other genes that were lost from plastomes of diverse lineages  
467 (Ruhlman & Jansen, 2018). The plastid-localized Acetyl-coenzyme A carboxylase (ACCase;  
468 prokaryotic) is another multisubunit protein complex that incorporates nuclear-encoded  
469 polypeptides and participates in fatty acid metabolism (Ohlrogge & Browse, 1995). The  
470 plastid *accD* encodes one subunit of the four-unit complex and was lost in numerous taxa,  
471 often those that experienced other gene loss and pseudogenization events (Ruhlman & Jansen,  
472 2018). Because plastid ACCase activity was thought an essential function (Kode et al., 2005)  
473 *accD* loss in several groups suggested that it may be expressed from a functional transfer to  
474 the nucleus or substituted by a redundant, nuclear-encoded enzyme (Konishi et al., 1996). In  
475 *Trifolium*, which lacks plastid *accD*, a functional transfer to the nucleus was uncovered  
476 (Magee et al., 2010). Further investigation failed to detect any remnant of the *accD* sequence  
477 in the plastomes of *T. repens* or *T. pratense* while mutated copies were identified in *T.*  
478 *aureum* and *T. grandiflorum* (Sabir et al., 2014). The 15-amino acid C-terminal catalytic  
479 domain of the ACCD protein, which is minimally required for prokaryotic ACCase function  
480 (Lee et al., 2004), was identified in the mutated copies and may indicate functionality.  
481 Probing nuclear transcriptomes from *T. repens* and *T. pratense* revealed that, as in *T.*  
482 *subterraneum* (Magee et al., 2010), a putatively functional ACCD protein was being  
483 expressed from a fusion sequence that included the ACCD catalytic domain (~270 aa) fused  
484 to the plastid target peptide from nuclear-encoded, plastid-targeted LPD1 (493 aa). Probing  
485 transcriptomes of related legumes that contained intact plastid *accD* was able to detect high  
486 identity copies of the ACCD core sequence suggesting that incorporation at nuclear loci

487 predated the degradation of plastid *accD* (Sabir et al., 2014). Functional redundancy was  
488 demonstrated for prokaryotic ACCase (Babiychuk et al., 2011; Rousseau-Gueutin et al., 2013)  
489 and other gene products through transfer or substitution in different lineages (Ueda et al.,  
490 2007, 2008).

491         The fate of *accD* sequences and both the prokaryotic and the single-polypeptide  
492 eukaryotic ACCase in Poales has been a matter of investigation for some time. Morton &  
493 Clegg (1993) identified a recombination hotspot in seven Poaceae plastomes in the region  
494 between *rbcL* and *psaI* (i.e. the locus containing *accD* sequences in non-Poaceae plastomes  
495 (Harris et al., 2013). Exploiting the fact that both the eukaryotic and prokaryotic ACCases  
496 contain biotinylated polypeptides, Konishi et al. (1996) were able to identify which form of  
497 the enzyme was active in plastids from across the diversity of the green plant lineage,  
498 including two non-photosynthetic representatives. Differentiating the two enzymes by  
499 molecular weight revealed that only one group examined did not contain the 35 kDa peptide  
500 that represented the prokaryotic holoenzyme: Poaceae. Closer examination of Poales using  
501 PCR product sequencing combined with Southern blots probed with plastid *accD* from  
502 Commelinaceae taxa demonstrated pseudogenization or deletion in representatives of three  
503 families, Restionaceae, Joinvilleaceae and Poaceae (Harris et al., 2013). Extending the loss of  
504 *accD* to include the Cyperaceae (Cyperus, Ren et al., 2021; Elocharis, Lee et al., 2020) and  
505 now Juncaceae suggests either extreme lability of the coding sequence in Poales or that this  
506 gene was transferred or substituted by a nuclear encoded activity in a common ancestor.  
507 Differential nuclear retention, expression and transport of the gene product back to plastids  
508 among the various lineages could result in relaxed selection on the plastid gene (Ueda et al.,  
509 2007; Park et al., 2017).

510           The opportunity to sample deeply across and within lineages is revealing that the  
511 unusual variation identified by early Southern blots and more recent plastome sequencing  
512 suggests that these ‘unusual’ structural changes are not unique. The suite of plastid genes that  
513 are susceptible to pseudogenization or loss appears consistent across photosynthetic seed  
514 plants. Understanding phylogeny, inherent to evolutionary studies, requires deep sampling,  
515 high-quality sequencing, assembly and alignment to infer relationships. As next generation  
516 sequencing and single-molecule long-read sequencing platforms expand and become more  
517 accessible, reads will be generated for many diverse taxa. Where long sequence repeats  
518 exceed insert sizes in next gen systems, long reads will be able to ‘bridge the gap’. The ability  
519 to translate raw sequence reads into usable data for evolutionary and functional inquiries  
520 depends on advanced computational tools that provide fast, flexible platforms without vast  
521 computational demand. Facilitating this effort, the ptGAUL pipeline provides a fast and easy  
522 tool for assembling plastomes from long-read data, which will enable the characterization of  
523 repeat-rich, highly rearranged plastomes.

524

## 525 **ACKNOWLEDGEMENTS**

526 We thank the UNC greenhouse staff for maintaining living *Juncus* materials and the UNC  
527 herbarium staff for storing our voucher specimens. We are very grateful for the UNC longleaf  
528 high-performance cluster for computational resources. This work was supported by National  
529 Science Foundation IOS-2034929 to A.M.J and C.D.J.

530

## 531 **REFERENCES**

532 Altschul, S. F., Gish, W., Miller, W., Myers, E. W., & Lipman, D. J. (1990). Basic local  
533 alignment search tool. *Journal of Molecular Biology*, 215(3), 403–410.  
534 Babiychuk, E., Vandepoele, K., Wissing, J., Garcia-Diaz, M., De Rycke, R., Akbari, H.,  
535 Joubès, J., Beeckman, T., Jänsch, L., & Frentzen, M. (2011). Plastid gene expression

- 536 and plant development require a plastidic protein of the mitochondrial transcription  
537 termination factor family. *Proceedings of the National Academy of Sciences*, 108(16),  
538 6674–6679.
- 539 Balslev, H. (2018). Two new species of *Juncus* (Juncaceae) from South America. *Phytotaxa*,  
540 376(2), 97–102. <https://doi.org/10.11646/phytotaxa.376.2.3>
- 541 Benson, G. (1999). Tandem repeats finder: A program to analyze DNA sequences. *Nucleic  
542 Acids Research*, 27(2), 573–580.
- 543 Bethune, K., Mariac, C., Couderc, M., Scarcelli, N., Santoni, S., Ardisson, M., Martin, J.,  
544 Montúfar, R., Klein, V., & Sabot, F. (2019). Long-fragment targeted capture for  
545 long-read sequencing of plastomes. *Applications in Plant Sciences*, 7(5), e1243.
- 546 Brožová, V., Pročková, J., & Drábková, L. Z. (2022). Toward finally unraveling the  
547 phylogenetic relationships of Juncaceae with respect to another cyperid family,  
548 Cyperaceae. *Molecular Phylogenetics and Evolution*, 177, 107588.
- 549 Cai, Z., Guisinger, M., Kim, H. G., Ruck, E., Blazier, J. C., McMurtry, V., Kuehl, J. V.,  
550 Boore, J., & Jansen, R. K. (2008). Extensive reorganization of the plastid genome of  
551 *Trifolium subterraneum* (Fabaceae) is associated with numerous repeated sequences  
552 and novel DNA insertions. *Journal of Molecular Evolution*, 67(6), 696–704.
- 553 Choi, I., Jansen, R., & Ruhlman, T. (2019). Lost and found: Return of the inverted repeat in  
554 the legume clade defined by its absence. *Genome Biology and Evolution*, 11(4), 1321–  
555 1333.
- 556 Choi, I., Jansen, R., & Ruhlman, T. (2020). Caught in the act: Variation in plastid genome  
557 inverted repeat expansion within and between populations of *Medicago minima*.  
558 *Ecology and Evolution*, 10(21), 12129–12137.
- 559 Chumley, T. W., Palmer, J. D., Mower, J. P., Fourcade, H. M., Calie, P. J., Boore, J. L., &  
560 Jansen, R. K. (2006). The complete chloroplast genome sequence of *Pelargonium* ×  
561 *hortorum*: Organization and evolution of the largest and most highly rearranged  
562 chloroplast genome of land plants. *Molecular Biology and Evolution*, 23(11), 2175–  
563 2190.
- 564 Compeau, P. E. C., Pevzner, P. A., & Tesler, G. (2011). How to apply de Bruijn graphs to  
565 genome assembly. *Nature Biotechnology*, 29(11), 987–991.  
566 <https://doi.org/10.1038/nbt.2023>
- 567 Cullings, K. W. (1992). Design and testing of a plant-specific PCR primer for ecological and  
568 evolutionary studies. *Molecular Ecology*, 1(4), 233–240.  
569 <https://doi.org/10.1111/j.1365-294x.1992.tb00182.x>
- 570 Danecek, P., Bonfield, J. K., Liddle, J., Marshall, J., Ohan, V., Pollard, M. O., Whitwham, A.,  
571 Keane, T., McCarthy, S. A., Davies, R. M., & Li, H. (2021). Twelve years of  
572 SAMtools and BCFtools. *GigaScience*, 10(2).  
573 <https://doi.org/10.1093/gigascience/giab008>
- 574 Darling, A. C. E., Mau, B., Blattner, F. R., & Perna, N. T. (2004). Mauve: Multiple  
575 Alignment of Conserved Genomic Sequence With Rearrangements. *Genome Research*,  
576 14(7), 1394. <https://doi.org/10.1101/gr.2289704>
- 577 Darshetkar, A. M., Datar, M. N., Tamhankar, S., Li, P., & Choudhary, R. K. (2019).  
578 Understanding evolution in Poales: Insights from Eriocaulaceae plastome. *PLoS ONE*,  
579 14(8). <https://doi.org/10.1371/journal.pone.0221423>
- 580 Darzentas, N. (2010). Circoletto: Visualizing sequence similarity with Circos. *Bioinformatics*,  
581 26(20).



- 582 Dierckxsens, N., Mardulyn, P., & Smits, G. (2017). NOVOPlasty: De novo assembly of  
583 organelle genomes from whole genome data. *Nucleic Acids Research*, *45*(4), e18–e18.  
584 <https://doi.org/10.1093/nar/gkw955>
- 585 Drábková, L. (2010). Phylogenetic relationships within Juncaceae: Evidence from all three  
586 genomic compartments with notes to the morphology. In *Seberg, O., Petersen, G.,*  
587 *Barford and Davis: Diversity, Phylogeny, and Evolution in the Monocotyledons* (pp.  
588 389–416) Aarhus University Press.
- 589 Drábková, L., Kirschner, J., & Vlček, Č. (2006). Phylogenetic relationships within *Luzula* DC.  
590 and *Juncus* L.(Juncaceae): A comparison of phylogenetic signals of trnL-trnF  
591 intergenic spacer, trnL intron and rbcL plastome sequence data. *Cladistics*, *22*(2),  
592 132–143.
- 593 Ferrarini, M., Moretto, M., Ward, J. A., Šurbanovski, N., Stevanović, V., Giongo, L., Viola,  
594 R., Cavalieri, D., Velasco, R., & Cestaro, A. (2013). An evaluation of the PacBio RS  
595 platform for sequencing and de novo assembly of a chloroplast genome. *BMC*  
596 *Genomics*, *14*(1), 1–12.
- 597 Finn, R. D., Clements, J., & Eddy, S. R. (2011). HMMER web server: Interactive sequence  
598 similarity searching. *Nucleic Acids Research*, *39*, W29–W37.  
599 <https://doi.org/10.1093/nar/gkr367>
- 600 Freudenthal, J. A., Pfaff, S., Terhoeven, N., Korte, A., Ankenbrand, M. J., & Förster, F.  
601 (2020). A systematic comparison of chloroplast genome assembly tools. *Genome*  
602 *Biology*, *21*(1), 1–21. <https://doi.org/10.1186/s13059-020-02153-6>
- 603 Goulding, S. E., Wolfe, K., Olmstead, R., & Morden, C. (1996). Ebb and flow of the  
604 chloroplast inverted repeat. *Molecular and General Genetics*, *252*(1), 195–206.
- 605 Guisinger, M. M., Chumley, T. W., Kuehl, J. V., Boore, J. L., & Jansen, R. K. (2010).  
606 Implications of the plastid genome sequence of *Typha* (Typhaceae, Poales) for  
607 understanding genome evolution in Poaceae. *Journal of Molecular Evolution*, *70*(2),  
608 149–166.
- 609 Haberle, R. C., Fourcade, H. M., Boore, J. L., & Jansen, R. K. (2008). Extensive  
610 rearrangements in the chloroplast genome of *Trachelium caeruleum* are associated  
611 with repeats and tRNA genes. *Journal of Molecular Evolution*, *66*(4), 350–361.
- 612 Harris, M. E., Meyer, G., Vandergon, T., & Vandergon, V. O. (2013). Loss of the acetyl-CoA  
613 carboxylase (accD) gene in Poales. *Plant Molecular Biology Reporter*, *31*(1), 21–31.
- 614 Hochbach, A., Linder, H. P., & Röser, M. (2018). Nuclear genes, matK and the phylogeny of  
615 the Poales. *Taxon*, *67*(3), 521–536.
- 616 Hofacker, I. L. (2003). Vienna RNA secondary structure server. *Nucleic acids*  
617 *research*, *31*(13), 3429–3431.
- 618 Hori, K., Maruyama, F., Fujisawa, T., Togashi, T., Yamamoto, N., Seo, M., Sato, S., Yamada,  
619 T., Mori, H., & Tajima, N. (2014). *Klebsormidium flaccidum* genome reveals primary  
620 factors for plant terrestrial adaptation. *Nature Communications*, *5*(1), 1–9.
- 621 Huang, Y., Escalona, M., Morrison, G., Marimuthu, M. P., Nguyen, O., Toffelmier, E.,  
622 Shaffer, H. B., & Litt, A. (2022). Reference genome assembly of the big berry  
623 Manzanita (*Arctostaphylos glauca*). *Journal of Heredity*, *113*(2), 188–196.
- 624 Hunter, J. D. (2007). Matplotlib: A 2D graphics environment. *Computing in Science and*  
625 *Engineering*, *9*(3), 90–95. <https://doi.org/10.1109/mcse.2007.55>
- 626 Ifuku, K., Endo, T., Shikanai, T., & Aro, E.-M. (2011). Structure of the chloroplast NADH  
627 dehydrogenase-like complex: Nomenclature for nuclear-encoded subunits. *Plant and*  
628 *Cell Physiology*, *52*(9), 1560–1568.

- 629 Jansen, R. K., & Ruhlman, T. A. (2012). Plastid Genomes of Seed Plants. In *Genomics of*  
630 *chloroplasts and mitochondria* (pp. 103–126). Springer. <https://doi.org/10.1007/978->  
631 [94-007-2920-9\\_5](https://doi.org/10.1007/978-94-007-2920-9_5)
- 632 Jiang, H., Tian, J., Yang, J., Dong, X., Zhong, Z., Mwachala, G., Zhang, C., Hu, G., & Wang,  
633 Q. (2022). Comparative and phylogenetic analyses of six *Kenya Polystachya*  
634 (Orchidaceae) species based on the complete chloroplast genome sequences. *BMC*  
635 *Plant Biology*, 22(1), 1–21. <https://doi.org/10.1186/s12870-022-03529-5>
- 636 Jin, J. J., Yu, W. B., Yang, J. B., Song, Y., Depamphilis, C. W., Yi, T. S., & Li, D. Z. (2020).  
637 GetOrganelle: A fast and versatile toolkit for accurate de novo assembly of organelle  
638 genomes. *Genome Biology*, 21(1), 1–31. <https://doi.org/10.1186/s13059-020-02154-5>
- 639 Jones, E., Simpson, D. A., Hodkinson, T. R., Chase, M. W., & Parnell, J. A. (2007). The  
640 Juncaceae-Cyperaceae interface: A combined plastid sequence analysis. *Aliso: A*  
641 *Journal of Systematic and Floristic Botany*, 23(1), 55–61.
- 642 Jung, H., Winefield, C., Bombarely, A., Prentis, P., & Waterhouse, P. (2019). Tools and  
643 Strategies for Long-Read Sequencing and De Novo Assembly of Plant Genomes.  
644 *Trends in Plant Science*, 24(8), 700–724. <https://doi.org/10.1016/j.tplants.2019.05.003>
- 645 Kearse, M., Moir, R., Wilson, A., Stones-Havas, S., Cheung, M., Sturrock, S., Buxton, S.,  
646 Cooper, A., Markowitz, S., & Duran, C. (2012). Geneious Basic: An integrated and  
647 extendable desktop software platform for the organization and analysis of sequence  
648 data. *Bioinformatics*, 28(12), 1647–1649.
- 649 Kent, W. J. (2002). BLAT—The BLAST-Like Alignment Tool. *Genome Research*, 12(4),  
650 656. <https://doi.org/10.1101/gr.229202>
- 651 Kim, K. J., & Lee, H. L. (2005). Widespread occurrence of small inversions in the chloroplast  
652 genomes of land plants. *Molecules & Cells*, 19(1), 104–113.
- 653 Kode, V., Mudd, E. A., Iamtham, S., & Day, A. (2005). The tobacco plastid accD gene is  
654 essential and is required for leaf development. *The Plant Journal*, 44(2), 237–244.
- 655 Kolmogorov, M., Yuan, J., Lin, Y., & Pevzner, P. A. (2019). Assembly of long, error-prone  
656 reads using repeat graphs. *Nature Biotechnology*, 37(5), 540–546.
- 657 Konishi, T., Shinohara, K., Yamada, K., & Sasaki, Y. (1996). Acetyl-CoA carboxylase in  
658 higher plants: Most plants other than gramineae have both the prokaryotic and the  
659 eukaryotic forms of this enzyme. *Plant and Cell Physiology*, 37(2), 117–122.
- 660 Koren, S., Walenz, B. P., Berlin, K., Miller, J. R., Bergman, N. H., & Phillippy, A. M. (2017).  
661 Canu: Scalable and accurate long-read assembly via adaptive k-mer weighting and  
662 repeat separation. *Genome Research*, 27(5), 722–736.
- 663 Lee, C., Ruhlman, T. A., & Jansen, R. K. (2020). Unprecedented Intraindividual Structural  
664 Heteroplasmy in *Eleocharis* (Cyperaceae, Poales) Plastomes. *Genome Biology and*  
665 *Evolution*, 12(5), 641–655. <https://doi.org/10.1093/gbe/evaa076>
- 666 Lee, C., Choi, I., Cardoso, D., de Lima, H. C., de Queiroz, L. P., Wojciechowski, M. F.,  
667 Jansen, R. K., & Ruhlman, T. A. (2021). The chicken or the egg? Plastome evolution  
668 and an independent loss of the inverted repeat in papilionoid legumes. *The Plant*  
669 *Journal*, 107(3), 861–875.
- 670 Lee, H. L., Jansen, R. K., Chumley, T. W., & Kim, K. J. (2007). Gene relocations within  
671 chloroplast genomes of *Jasminum* and *Menodora* (Oleaceae) are due to multiple,  
672 overlapping inversions. *Molecular Biology and Evolution*, 24(5), 1161–1180.
- 673 Lee, S. S., Jeong, W. J., Bae, J. M., Bang, J. W., Liu, J. R., & Harn, C. H. (2004).  
674 Characterization of the plastid-encoded carboxyltransferase subunit (accD) gene of  
675 potato. *Molecules & Cells*, 17(3), 442–429.

- 676 Li, J., Su, Y., & Wang, T. (2018). The repeat sequences and elevated substitution rates of the  
677 chloroplast accD gene in cupressophytes. *Frontiers in Plant Science*, *9*, 533.
- 678 Li, Y., & Deng, X. (2021). The complete chloroplast genome of the marine microalgae  
679 *Chaetoceros muellerii* (Chaetoceroceae). *Mitochondrial DNA Part B*, *6*(2), 373–375.
- 680 Liao, X., Li, M., Hu, K., Wu, F. X., Gao, X., & Wang, J. (2021). A sensitive repeat  
681 identification framework based on short and long reads. *Nucleic Acids Research*,  
682 *49*(17), e100–e100. <https://doi.org/10.1093/nar/gkab563>
- 683 Liu, H., Ye, H., Zhang, N., Ma, J., Wang, J., Hu, G., Li, M., & Zhao, P. (2022). Comparative  
684 Analyses of Chloroplast Genomes Provide Comprehensive Insights into the Adaptive  
685 Evolution of *Paphiopedilum* (Orchidaceae). *Horticulturae*, *8*(5), 391.  
686 <https://doi.org/10.3390/horticulturae8050391>
- 687 Lohse, M., Drechsel, O., Kahlau, S., & Bock, R. (2013). OrganellarGenomeDRAW—a suite  
688 of tools for generating physical maps of plastid and mitochondrial genomes and  
689 visualizing expression data sets. *Nucleic Acids Research*, *41*(W1), W575–W581.
- 690 Lu, M., Fang, Z., Sheng, F., Tong, X., & Han, R. (2021). Characterization and phylogenetic  
691 analysis of the complete chloroplast genome of *Juncus effusus* L. *Mitochondrial DNA*  
692 *Part B*, *6*(5), 1612–1613.
- 693 Magee, A. M., Aspinall, S., Rice, D. W., Cusack, B. P., Sémon, M., Perry, A. S., Stefanović,  
694 S., Milbourne, D., Barth, S., & Palmer, J. D. (2010). Localized hypermutation and  
695 associated gene losses in legume chloroplast genomes. *Genome Research*, *20*(12),  
696 1700–1710.
- 697 Mak, Q. C., Wick, R. R., Holt, J. M., & Wang, J. R. (2022). Polishing de novo nanopore  
698 assemblies of bacteria and eukaryotes with FMLRC2. *BioRxiv*.
- 699 Maréchal, A., & Brisson, N. (2010). Recombination and the maintenance of plant organelle  
700 genome stability. *New Phytologist*, *186*(2), 299–317.
- 701 Mariac, C., Scarcelli, N., Pouzadou, J., Barnaud, A., Billot, C., Faye, A., Kougbéadjou, A.,  
702 Maillol, V., Martin, G., & Sabot, F. (2014). Cost-effective enrichment hybridization  
703 capture of chloroplast genomes at deep multiplexing levels for population genetics and  
704 phylogeography studies. *Molecular Ecology Resources*, *14*(6), 1103–1113.
- 705 Mayjonade, B., Gouzy, J., Donnadieu, C., Pouilly, N., Marande, W., Callot, C., Langlade, N.,  
706 & Muñoz, S. (2016). Extraction of high-molecular-weight genomic DNA for long-  
707 read sequencing of single molecules. *Biotechniques*, *61*(4), 203–205.
- 708 Miller, J. R., Delcher, A. L., Koren, S., Venter, E., Walenz, B. P., Brownley, A., Johnson, J.,  
709 Li, K., Mobarry, C., & Sutton, G. (2008). Aggressive assembly of pyrosequencing  
710 reads with mates. *Bioinformatics*, *24*(24), 2818–2824.
- 711 Miyamoto, M., Motooka, D., Gotoh, K., Imai, T., Yoshitake, K., Goto, N., Iida, T., Yasunaga,  
712 T., Horii, T., & Arakawa, K. (2014). Performance comparison of second- and third-  
713 generation sequencers using a bacterial genome with two chromosomes. *BMC*  
714 *Genomics*, *15*(1), 1–9.
- 715 Morton, B. R., & Clegg, M. T. (1993). A chloroplast DNA mutational hotspot and gene  
716 conversion in a noncoding region near rbcL in the grass family (Poaceae). *Current*  
717 *Genetics*, *24*(4), 357–365.
- 718 Nadalin, F., Vezzi, F., & Policriti, A. (2012). GapFiller: A de novo assembly approach to fill  
719 the gap within paired reads. *BMC Bioinformatics*, *13*(14), 1–16.
- 720 Nashima, K., Terakami, S., Nishitani, C., Kunihisa, M., Shoda, M., Takeuchi, M., Urasaki, N.,  
721 Tarora, K., Yamamoto, T., & Katayama, H. (2015). Complete chloroplast genome  
722 sequence of pineapple (*Ananas comosus*). *Tree Genetics & Genomes*, *11*(3), 1–11.
- 723 Ohlrogge, J., & Browse, J. (1995). Lipid biosynthesis. *The Plant Cell*, *7*(7), 957.

- 724 Oldenburg, D. J., & Bendich, A. J. (2015). DNA maintenance in plastids and mitochondria of  
725 plants. *Frontiers in Plant Science*, *6*, 883.
- 726 Park, S., Ruhlman, T. A., Weng, M.-L., Hajrah, N. H., Sabir, J. S., & Jansen, R. K. (2017).  
727 Contrasting patterns of nucleotide substitution rates provide insight into dynamic  
728 evolution of plastid and mitochondrial genomes of *Geranium*. *Genome Biology and  
729 Evolution*, *9*(6), 1766–1780.
- 730 Planta, J., Liang, Y.-Y., Xin, H., Chansler, M. T., Prather, L. A., Jiang, N., Jiang, J., & Childs,  
731 K. L. (2022). Chromosome-scale genome assemblies and annotations for Poales  
732 species *Carex cristatella*, *Carex scoparia*, *Juncus effusus*, and *Juncus inflexus*. *G3*,  
733 *12*(10), jkac211.
- 734 Quail, M. A., Otto, T. D., Gu, Y., Harris, S. R., Skelly, T. F., McQuillan, J. A., Swerdlow, H.  
735 P., & Oyola, S. O. (2012). Optimal enzymes for amplifying sequencing libraries.  
736 *Nature Methods*, *9*(1), 10–11.
- 737 Redwan, R., Saidin, A., & Kumar, S. (2015). Complete chloroplast genome sequence of MD-  
738 2 pineapple and its comparative analysis among nine other plants from the subclass  
739 Commelinidae. *BMC Plant Biology*, *15*(1), 1–20.
- 740 Ren, W., Guo, D., Xing, G., Yang, C., Zhang, Y., Yang, J., Niu, L., Zhong, X., Zhao, Q., &  
741 Cui, Y. (2021). Complete chloroplast genome sequence and comparative and  
742 phylogenetic analyses of the cultivated *Cyperus esculentus*. *Diversity*, *13*(9), 405.
- 743 Rocha, E. P. (2003). DNA repeats lead to the accelerated loss of gene order in bacteria.  
744 *Trends in Genetics*, *19*(11), 600–603.
- 745 Rousseau-Guetin, M., Huang, X., Higginson, E., Ayliffe, M., Day, A., & Timmis, J. N.  
746 (2013). Potential functional replacement of the plastidic acetyl-CoA carboxylase  
747 subunit (accD) gene by recent transfers to the nucleus in some angiosperm lineages.  
748 *Plant Physiology*, *161*(4), 1918–1929.
- 749 Ruhlman, T. A., Chang, W. J., Chen, J. J., Huang, Y. T., Chan, M. T., Zhang, J., Liao, D. C.,  
750 Blazier, J. C., Jin, X., & Shih, M. C. (2015). NDH expression marks major transitions  
751 in plant evolution and reveals coordinate intracellular gene loss. *BMC Plant Biology*,  
752 *15*(1), 1–9.
- 753 Ruhlman, T. A., Zhang, J., Blazier, J. C., Sabir, J. S., & Jansen, R. K. (2017).  
754 Recombination-dependent replication and gene conversion homogenize repeat  
755 sequences and diversify plastid genome structure. *American Journal of Botany*, *104*(4),  
756 559–572.
- 757 Ruhlman, T. A., & Jansen, R. K. (2018). Aberration or analogy? The atypical plastomes of  
758 Geraniaceae. In *Advances in botanical research* (pp. 223–262). Elsevier.
- 759 Ruhlman, T. A., & Jansen, R. K. (2021). The plastid genomes of flowering plants: Essential  
760 principles. In Maliga, P. (Eds), *Chloroplast Biotechnology* (pp.3-27). Humana.  
761 [https://doi.org/10.1007/978-1-0716-1472-3\\_1](https://doi.org/10.1007/978-1-0716-1472-3_1)
- 762 Sabir, J., Schwarz, E., Ellison, N., Zhang, J., Baeshen, N. A., Mutwakil, M., Jansen, R., &  
763 Ruhlman, T. (2014). Evolutionary and biotechnology implications of plastid genome  
764 variation in the inverted-repeat-lacking clade of legumes. *Plant Biotechnology Journal*,  
765 *12*(6), 743–754.
- 766 Scheunert, A., Dorfner, M., Lingl, T., & Oberprieler, C. (2020). Can we use it? On the utility  
767 of de novo and reference-based assembly of Nanopore data for plant plastome  
768 sequencing. *PLoS One*, *15*(3), e0226234.
- 769 Schwarz, E. N., Ruhlman, T. A., Sabir, J. S., Hajrah, N. H., Alharbi, N. S., Al-Malki, A. L.,  
770 Bailey, C. D., & Jansen, R. K. (2015). Plastid genome sequences of legumes reveal

- 771 parallel inversions and multiple losses of rps16 in papilionoids. *Journal of Systematics*  
772 *and Evolution*, 53(5), 458–468.
- 773 Shearman, J. R., Sonthirod, C., Naktang, C., Sangsrakru, D., Yoocha, T., Chatbanyong, R.,  
774 Vorakuldumrongchai, S., Chusri, O., Tangphatsornruang, S., & Pootakham, W. (2020).  
775 Assembly of the durian chloroplast genome using long PacBio reads. *Scientific*  
776 *Reports*, 10(1), 1–8.
- 777 Shen, W., Le, S., Li, Y., & Hu, F. (2016). SeqKit: A cross-platform and ultrafast toolkit for  
778 FASTA/Q file manipulation. *PloS One*, 11(10), e0163962.
- 779 Shikanai, T. (2014). Central role of cyclic electron transport around photosystem I in the  
780 regulation of photosynthesis. *Current Opinion in Biotechnology*, 26, 25–30.
- 781 Shikanai, T., Endo, T., Hashimoto, T., Yamada, Y., Asada, K., & Yokota, A. (1998). Directed  
782 disruption of the tobacco ndhB gene impairs cyclic electron flow around photosystem  
783 I. *Proceedings of the National Academy of Sciences*, 95(16), 9705–9709.
- 784 Sloan, D. B., Triant, D. A., Forrester, N. J., Bergner, L. M., Wu, M., & Taylor, D. R. (2014).  
785 A recurring syndrome of accelerated plastid genome evolution in the angiosperm tribe  
786 Sileneae (Caryophyllaceae). *Molecular Phylogenetics and Evolution*, 72, 82–89.
- 787 Soorni, A., Haak, D., Zaitlin, D., & Bombarely, A. (2017). Organelle\_PBA, a pipeline for  
788 assembling chloroplast and mitochondrial genomes from PacBio DNA sequencing  
789 data. *BMC Genomics*, 18(1), 1–8.
- 790 Stadermann, K. B., Weisshaar, B., & Holtgräwe, D. (2015). SMRT sequencing only de novo  
791 assembly of the sugar beet (*Beta vulgaris*) chloroplast genome. *Bmc Bioinformatics*,  
792 16(1), 1–10.
- 793 Syme, A. E., McLay, T. G. B., Udovicic, F., Cantrill, D. J., Murphy, D. J., McLay, T. G. B.,  
794 Udovicic, F., Cantrill, D. J., & Murphy, D. J. (2021). Long-read assemblies reveal  
795 structural diversity in genomes of organelles – an example with *Acacia pycnantha*.  
796 *Gigabyte*, 2021, 1–23. <https://doi.org/10.46471/gigabyte.36>
- 797 Tillich, M., Lehwark, P., Pellizzer, T., Ulbricht-Jones, E. S., Fischer, A., Bock, R., & Greiner,  
798 S. (2017). GeSeq—versatile and accurate annotation of organelle genomes. *Nucleic*  
799 *Acids Research*, 45(W1), W6–W11.
- 800 Twyford, A. D., & Ness, R. W. (2017). Strategies for complete plastid genome sequencing.  
801 *Molecular Ecology Resources*, 17(5), 858–868. [https://doi.org/10.1111/1755-](https://doi.org/10.1111/1755-0998.12626)  
802 [0998.12626](https://doi.org/10.1111/1755-0998.12626)
- 803 Ueda, M., Fujimoto, M., Arimura, S., Murata, J., Tsutsumi, N., & Kadowaki, K. (2007). Loss  
804 of the rpl32 gene from the chloroplast genome and subsequent acquisition of a  
805 preexisting transit peptide within the nuclear gene in *Populus*. *Gene*, 402(1–2), 51–56.
- 806 Ueda, M., Nishikawa, T., Fujimoto, M., Takanashi, H., Arimura, S., Tsutsumi, N., &  
807 Kadowaki, K. (2008). Substitution of the gene for chloroplast RPS16 was assisted by  
808 generation of a dual targeting signal. *Molecular Biology and Evolution*, 25(8), 1566–  
809 1575.
- 810 Wang, J. R., Holt, J., McMillan, L., & Jones, C. D. (2018). FMLRC: Hybrid long read error  
811 correction using an FM-index. *BMC Bioinformatics*, 19(1), 1–11.  
812 <https://doi.org/10.1186/s12859-018-2051-3>
- 813 Wang, W., Schalamun, M., Morales-Suarez, A., Kainer, D., Schwessinger, B., & Lanfear, R.  
814 (2018). Assembly of chloroplast genomes with long- and short-read data: A  
815 comparison of approaches using *Eucalyptus pauciflora* as a test case. *BMC Genomics*,  
816 19(1), 1–15. <https://doi.org/10.1186/s12864-018-5348-8>
- 817 Weng, M. L., Blazier, J. C., Govindu, M., & Jansen, R. K. (2014). Reconstruction of the  
818 ancestral plastid genome in Geraniaceae reveals a correlation between genome

- 819 rearrangements, repeats, and nucleotide substitution rates. *Molecular Biology and*  
820 *Evolution*, 31(3), 645–659.
- 821 Wick, R. R., Judd, L. M., Gorrie, C. L., & Holt, K. E. (2017). Unicycler: Resolving bacterial  
822 genome assemblies from short and long sequencing reads. *PLoS Computational*  
823 *Biology*, 13(6), e1005595.
- 824 Wick, R. R., Schultz, M. B., Zobel, J., & Holt, K. E. (2015). Bandage: Interactive  
825 visualization of de novo genome assemblies. *Bioinformatics*, 31(20), 3350–3352.
- 826 Wu, H., Yang, J.-B., Liu, J.-X., Li, D.-Z., & Ma, P.-F. (2021). Organelle Phylogenomics and  
827 Extensive Conflicting Phylogenetic Signals in the Monocot Order Poales. *Frontiers in*  
828 *Plant Science*, 12.
- 829 Xia, C., Wang, M., Guan, Y., Li, Y., & Li, J. (2022). Comparative analysis of complete  
830 chloroplast genome of ethnodrug *Aconitum episcopale* and insight into its  
831 phylogenetic relationships. *Scientific Reports*, 12(1), 1–13.  
832 <https://doi.org/10.1038/s41598-022-13524-3>
- 833 Xiang, Q. Y., Crawford, D. J., Wolfe, A. D., Tang, Y. C., & DePamphilis, C. W. (1998).  
834 Origin and biogeography of *Aesculus* L. (Hippocastanaceae): a molecular  
835 phylogenetic perspective. *Evolution*, 52(4), 988–997. [https://doi.org/10.1111/j.1558-](https://doi.org/10.1111/j.1558-5646.1998.tb01828.x)  
836 [5646.1998.tb01828.x](https://doi.org/10.1111/j.1558-5646.1998.tb01828.x)
- 837 Xu, K., Lin, C., Lee, S. Y., Mao, L., & Meng, K. (2022). Comparative analysis of complete  
838 *Ilex* (Aquifoliaceae) chloroplast genomes: Insights into evolutionary dynamics and  
839 phylogenetic relationships. *BMC Genomics*, 23(1), 1–14.  
840 <https://doi.org/10.1186/s12864-022-08397-9>
- 841 Yu, J., Fu, J., Fang, Y., Xiang, J., & Dong, H. (2022). Complete chloroplast genomes of  
842 *Rubus* species (Rosaceae) and comparative analysis within the genus. *BMC Genomics*,  
843 23(1), 1–14. <https://doi.org/10.1186/s12864-021-08225-6>
- 844 Zerbino, D. R. (2010). Using the Velvet de novo assembler for short-read sequencing  
845 technologies. *Current Protocols in Bioinformatics*, 31(1), 11–15.
- 846 Zhong, X. (2020). *Assembly, annotation and analysis of chloroplast genomes*. [Doctoral  
847 Thesis, The University of Western Australia]. <https://doi.org/10.26182/5f333d9ac2bee>
- 848 Zhu, B., Gao, Z., Luo, X., Feng, Q., Du, X., Weng, Q., & Cai, M. (2019). The complete  
849 chloroplast genome sequence of garden cress (*Lepidium sativum* L.) and its  
850 phylogenetic analysis in Brassicaceae family. *Mitochondrial DNA Part B*, 4(2), 3601–  
851 3602.

853

#### 854 **CONFLICT OF INTEREST**

855 The authors declare no competing financial interests.

856

#### 857 **DATA ACCESSIBILITY AND BENEFIT-SHARING**

858 Demultiplexed sequence data of short-read and long-read data are available for download

859 from the NCBI Sequence Read Archive (SRA) (BioProject PRJNA865266). The accession

860 numbers of *J. roemerianus* and *J. validus* are OP235509 and OP235510, respectively.

861 Information related to ptGAUL can be fetched in GitHub (<https://github.com/Bean061/ptgaul>).

862

### 863 **AUTHOR CONTRIBUTIONS**

864 WZ developed the ptGAUL pipeline assembled the *Juncus* plastome and prepared most of the

865 first draft of the manuscript. CEAF assembled downloaded, publicly available reads using

866 ptGAUL and made modification to the script. Chaehee provided *Eleocharis dulcis* long-read

867 data and confirmed the analyses on the rearrangement events of plastome and helped annotate

868 the *Juncus* plastomes. Ruisen Lu helped analyze the long repeats and SSR numbers in *Juncus*

869 and polished the annotation result for NCBI. Jeremy Wang helped modified the ptGAUL

870 script. Robert Jansen and Tracey Ruhlman helped discuss and write the introduction and

871 discussion on plastome rearrangement events. Alan Jones and Corbin Jones are the senior

872 corresponding authors guiding this project and they polished the prose.

873 **Table 1** ptGAUL performance on 15 published sequence data sets, including the information of assembled plastome from published papers and  
874 the information on assembled plastomes from ptGAUL. NA means low nucleotide sequence identity between assembled plastome between  
875 published data and our data. S means the samples are well assembled by ptGAUL, while F means the samples failed using ptGAUL. \* column  
876 includes the references we used for genome assembly in ptGAUL and the bold references were considered as references for comparisons with  
877 ptGAUL results.

| Species                          | Library preparation and sequencing methods | Raw read No./N50 (bp) | Reference               | Plastid size from ptGAUL (bp) (% nucleotide sequence identity to references) | Number of assembled plastid contigs from ptGAUL | Plastome reference used for ptGAUL (reference length from original studies)* |
|----------------------------------|--------------------------------------------|-----------------------|-------------------------|------------------------------------------------------------------------------|-------------------------------------------------|------------------------------------------------------------------------------|
| <i>Arctostaphylos glauca</i>     | WGS/PacBio                                 | 1814591/15245         | Huang et al., 2022      | 150241 (NA)                                                                  | 3 (S)                                           | <b>NC_035584.1/NC_042713.1/NC_047438.1/JAHSPW020000272.1 (118663 bp)</b>     |
| <i>Lepidium sativum</i>          | WGS/PacBio                                 | 400322/7277           | Zhu et al., 2019        | 153666 (99.9%)                                                               | 3 (S)                                           | <b>NC_047178.1 (154997 bp)</b>                                               |
| <i>Chaetoceros muellerii</i>     | WGS/PacBio                                 | 87313/12921           | Li & Deng, 2021         | 117304 (99.8%)                                                               | 1 (S)                                           | <b>MW004650.1 (116284 bp)</b>                                                |
| <i>Potentilla micrantha</i>      | WGS/PacBio                                 | 28638/2464            | Ferrarini et al., 2013  | 159850 (99.8%)                                                               | 3 (S)                                           | <b>NC_015206.1 (155691 bp)</b>                                               |
| <i>Durio zibethinus</i>          | WGS/PacBio                                 | 853182/9670           | Shearman et al., 2020   | 142806 (99.95%)                                                              | 1 (S)                                           | <b>MT321069 (163974 bp)</b>                                                  |
| <i>Beta vulgaris</i>             | WGS/PacBio                                 | 96874/3980            | Stadermann et al., 2015 | 155383 (99.9%)                                                               | 3 (S)                                           | <b>KR230391.1 (149722 bp)</b>                                                |
| <i>Eleocharis dulcis</i>         | WGS/PacBio                                 | 68167/16288           | Lee et al., 2020        | 199919 (99.5%)                                                               | 3 (S)                                           | <b>NC_047447.1 (199561 bp)</b>                                               |
| <i>Eucalyptus pauciflora</i>     | WGS/ONT                                    | 705554/24988          | Wang et al., 2018       | 158561 (99.0%)                                                               | 1 (S)                                           | <b>MZ670598.1/HM347959.1/NC_014570.1/AY780259.1/ NC_039597.1 (159942 bp)</b> |
| <i>Leucanthemum vulgare</i>      | Long range PCR/ONT                         | 18031/7900            | Scheunert et al., 2020  | 119593 (NA)                                                                  | 5 (F)                                           | <b>NC_047460.1 (150191 bp)</b>                                               |
| <i>Oryza glaberrima</i>          | Plastid capture/ONT                        | 81363/4319            | Bethune et al., 2019    | 124133 (NA)                                                                  | 4 (F)                                           | <b>NC_024175.1 (132629 bp)</b>                                               |
| <i>Cenchrus americanus</i>       | Plastid capture /ONT                       | 105760/5580           | Bethune et al., 2019    | 143162 (96.6%)                                                               | 3 (S)                                           | <b>NC_024171.1 (140718 bp)</b>                                               |
| <i>Digitaria exilis</i>          | Plastid capture /ONT                       | 141250/4028           | Bethune et al., 2019    | 136650 (96.0%)                                                               | 3 (S)                                           | <b>NC_024176.1 (140908 bp)</b>                                               |
| <i>Podococcus acaulis</i>        | Plastid capture /ONT                       | 249417/2621           | Bethune et al., 2019    | 81976 (NA)                                                                   | 2 (F)                                           | <b>NC_027276.1 (157688 bp)</b>                                               |
| <i>Raphia textilis</i>           | Plastid capture /ONT                       | 83833/2495            | Bethune et al., 2019    | 60089 (NA)                                                                   | 2 (F)                                           | <b>NC_020365.1 (157270 bp)</b>                                               |
| <i>Phytelephas aequatorialis</i> | Plastid capture /ONT                       | 202925/2551           | Bethune et al., 2019    | NA                                                                           | (F)                                             | <b>NC_029957.1 (159075 bp)</b>                                               |
| <i>Picea glauca</i>              | WGS/PacBio                                 | 563675/4671           | Soorni et al., 2017     | 123476 (98.9%)                                                               | 1 (S)                                           | <b>NC_021456.1 (124084 bp)</b>                                               |



878 **Table 2** Summary of features of the plastid genomes of four *Juncus* species, including length,  
 879 GC content, and gene numbers. The plastome data of *Juncus effusus* were from two different  
 880 two different sources, this paper and Lu et al. (2021). PCG =protein-coding genes.

| Genome Features               | <i>J. effusus</i> | <i>J. effusus</i> | <i>J. inflexus</i> | <i>J. roemerianus</i> | <i>J. validus</i> |
|-------------------------------|-------------------|-------------------|--------------------|-----------------------|-------------------|
| Accession No.                 | NC_059754.1       | Present study     | Present study      | OP235509              | OP235510          |
| No. of Illumina read clusters | 12443053          | 96,653,565        | 83412073           | 158922322             | 156712430         |
| No. of ONT reads and N50      | 0                 | 2960380/21529     | 2735792/24397      | 427549/15998          | 243884/14365      |
| Genome size (bp)              | 170612            | 178158            | 181566             | 196852                | 147183            |
| LSC length (bp)               | 81818             | 86497             | 86649              | 82944                 | 87215             |
| SSC length (bp)               | 7522              | 7539              | 7509               | 7902                  | 2046              |
| IR length (bp)                | 40636             | 42061             | 43704              | 53003                 | 28961             |
| Overall GC content, %         | 36.0              | 35.9              | 35.6               | 32.2                  | 34.7              |
| GC content in LSC, %          | 33.2              | 33.2              | 33.3               | 33.1                  | 31.6              |
| GC content in SSC, %          | 26.3              | 26                | 26.2               | 26.5                  | 23                |
| GC content in IR, %           | 39.7              | 39.5              | 38.7               | 37.5                  | 39.8              |
| Total No. of genes            | 129               | 133               | 134                | 136                   | 114               |
| No. of unique genes           | 105               | 106               | 106                | 106                   | 93                |
| No. of unique PCGs            | 72                | 72                | 72                 | 72                    | 60                |
| No. of unique tRNA genes      | 29                | 30                | 30                 | 30                    | 29                |
| No. of unique rRNA genes      | 4                 | 4                 | 4                  | 4                     | 4                 |

881 **Table 3** Statistics of dispersed and tandem repeats in *Typha*, *Ananas*, *Eriocaulon*, and *Juncus* plastomes

| Species                      | <i>Typha latifolia</i> | <i>Ananas comosus</i> | <i>Eriocaulon decemflorum</i> | <i>Juncus effusus</i> | <i>Juncus inflexus</i> | <i>Juncus roemerianus</i> | <i>Juncus validus</i> |
|------------------------------|------------------------|-----------------------|-------------------------------|-----------------------|------------------------|---------------------------|-----------------------|
| Genome size (no IRa)         | 134,642                | 132,862               | 125,164                       | 136,097               | 137,859                | 143,849                   | 118,221               |
| GC %                         | 35.5                   | 36.3                  | 34.2                          | 34.8                  | 34.6                   | 34.3                      | 33.5                  |
| <b>Dispersed repeat (DR)</b> |                        |                       |                               |                       |                        |                           |                       |
| Length of DRs                | 1,210                  | 1,495                 | 1,418                         | 15,117                | 13,229                 | 14,712                    | 14,714                |
| GC %                         | 33.7                   | 36.3                  | 33                            | 35                    | 36                     | 35.7                      | 34                    |
| GC % without DR              | 35.5                   | 36.3                  | 34.2                          | 34.7                  | 34.6                   | 34.1                      | 33.3                  |
| % of DR in genome            | 0.9                    | 1.1                   | 1.1                           | 11.1                  | 9.6                    | 10.2                      | 12.4                  |
| <b>Tandem repeat (TR)</b>    |                        |                       |                               |                       |                        |                           |                       |
| Length of TRs                | 3,270                  | 2,057                 | 859                           | 12,248                | 15,783                 | 22,978                    | 8,797                 |
| GC % of TRs                  | 8.8                    | 18.4                  | 20                            | 34.2                  | 33.4                   | 32.1                      | 32.1                  |
| Genome size without TRs      | 131,372                | 130,805               | 124,305                       | 123,849               | 122,076                | 120,871                   | 109,424               |
| GC % without TRs             | 36                     | 36.6                  | 34.3                          | 34.8                  | 34.8                   | 34.8                      | 33.6                  |
| % of TRs in genome           | 2.4                    | 1.5                   | 0.7                           | 9.0                   | 11.4                   | 16.0                      | 7.4                   |
| <b>Total repeat</b>          |                        |                       |                               |                       |                        |                           |                       |
| Length of total repeats      | 4,436                  | 3,552                 | 2,227                         | 23,345                | 26,451                 | 35,027                    | 22,577                |
| GC % of total repeats        | 12.6                   | 21.5                  | 27.5                          | 34.7                  | 34.7                   | 33.6                      | 33.5                  |
| GC % without total repeats   | 36                     | 36.6                  | 34.3                          | 34.8                  | 34.8                   | 34.5                      | 33.4                  |
| % of total repeats in genome | 3.3                    | 2.7                   | 1.8                           | 17.2                  | 19.2                   | 24.3                      | 19.1                  |

882

883 **Table 4** Summary of breakpoint and reversal distances for plastomes of *Juncus*, *Eriocaulon* and basal Poales.

| Species                       | <i>Typha latifolia</i> | <i>Ananas comosus</i> | <i>Eriocaulon decemflorum</i> | <i>J. effusus</i> | <i>J. inflexus</i> | <i>J. roemerianus</i> | <i>J. validus</i> |
|-------------------------------|------------------------|-----------------------|-------------------------------|-------------------|--------------------|-----------------------|-------------------|
| <i>Typha latifolia</i>        | —                      |                       |                               |                   |                    |                       |                   |
| <i>Ananas comosus</i>         | 0/0                    | —                     |                               |                   |                    |                       |                   |
| <i>Eriocaulon decemflorum</i> | 0/0                    | 0/0                   | —                             |                   |                    |                       |                   |
| <i>J. effusus</i>             | 15/19                  | 15/19                 | 15/19                         | —                 |                    |                       |                   |
| <i>J. inflexus</i>            | 15/19                  | 15/19                 | 15/19                         | —                 | —                  |                       |                   |
| <i>J. roemerianus</i>         | 17/20                  | 17/20                 | 17/20                         | 7/9               | 7/9                | —                     |                   |
| <i>J. validus</i>             | 14/17                  | 14/17                 | 14/17                         | 8/10              | 8/10               | 11/13                 | —                 |

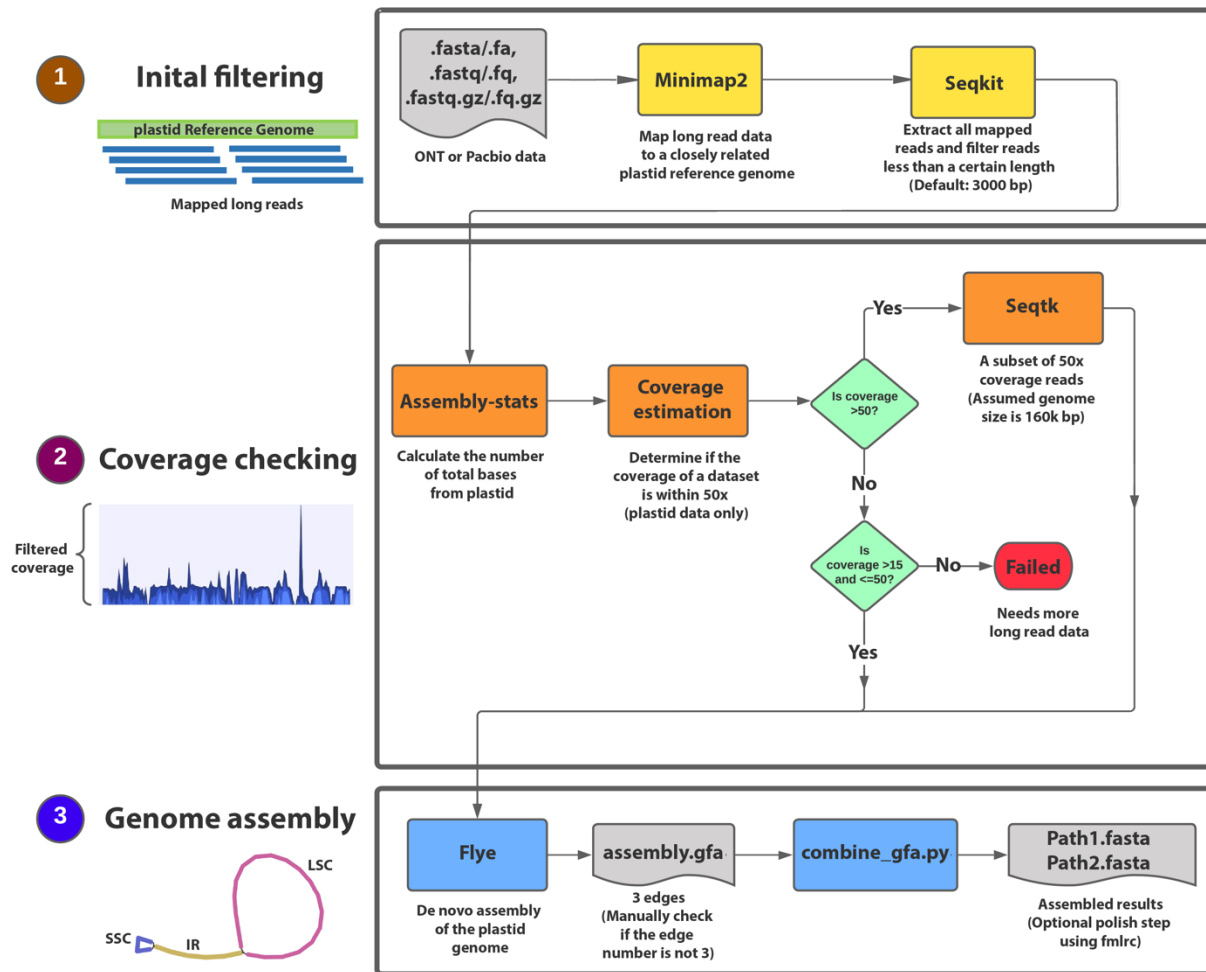

884  
885  
886  
887  
888  
889  
890

**Figure 1** ptGAUL workflow. The program starts with an initial filtering step to filter the long reads of the target species using at least one closely related reference plastome (1). Subsequently, the coverage for those filtered long reads is calculated and filtered to make sure it is about 50x (2). Finally, two paths of plastomes were obtained through Flye and a customized python script, `combine_gfa.py` (3).

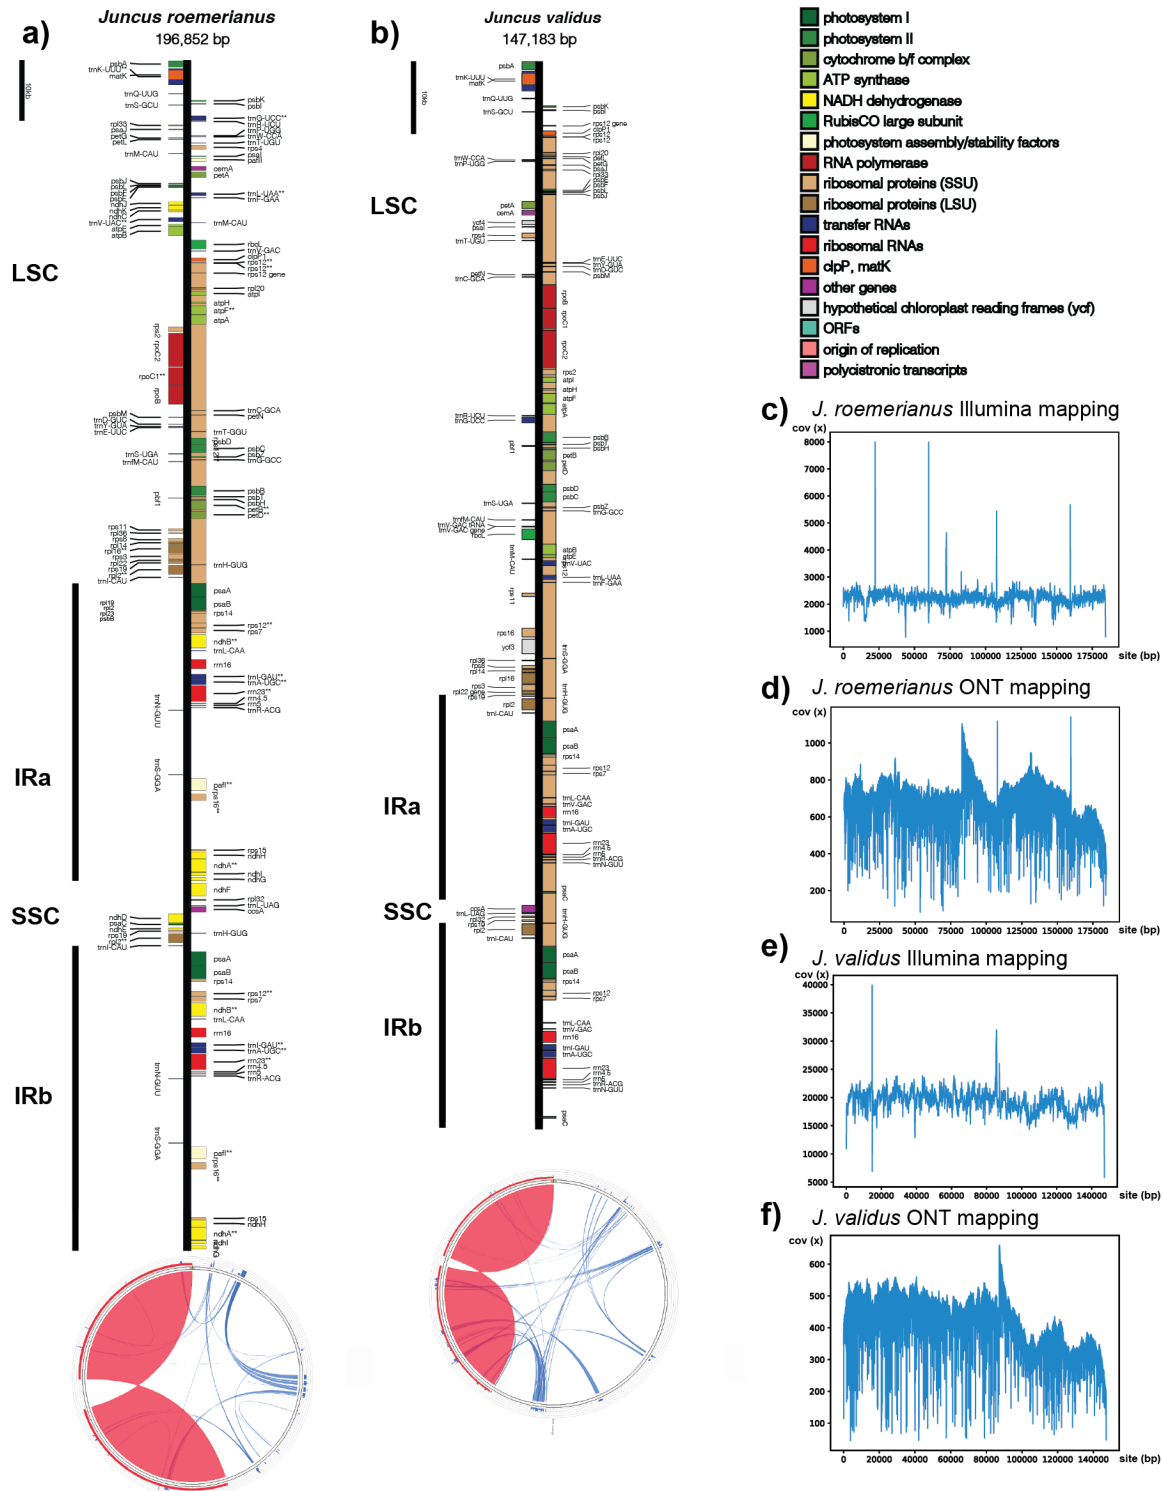

891  
892 **Figure 2** Plastome structural maps and read coverage graphs of *J. roemerianus* and *J. validus*.  
893 a) and b) Linear maps of *J. roemerianus* and *J. validus* plastome, respectively, were drawn by  
894 OGDRAW (Lohse et al., 2013). Genes that belong to different functional groups are color-  
895 coded. Small single copy (SSC), large single copy (LSC), and inverted repeats (IRa, IRb) are  
896 indicated for both plastomes. Circular representations of the two *Juncus* plasstomes were  
897 used to shot locations of repetitive DNA using Circoletto (Darzentas, 2010). The blue lines  
898 represent dispersed repeats in the plastome, while red regions represent the IR regions. c) - f)  
899 Read coverage plots of *J. roemerianus* and *J. validus* using Illumina reads and ONT reads,

900 respectively, showing the good quality of the assemblies. The  $x$  axis represents the position in  
901 the plastome, while  $y$  axis represents the coverage.  
902  
903  
904

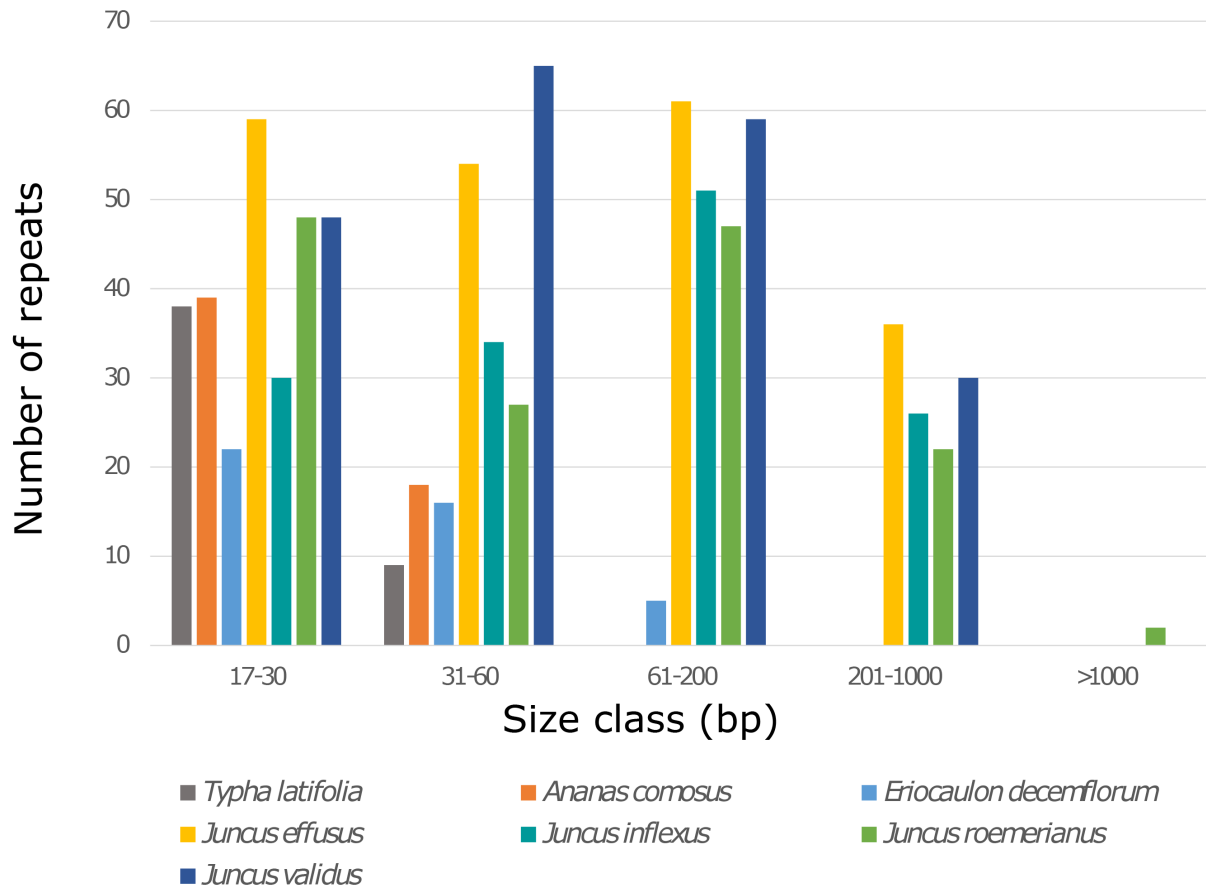

905  
906  
907 **Figure 3** Bar plot of dispersed repeats in plastomes from seven Poales species, including four  
908 newly assembled *Juncus* species.  
909  
910  
911  
912  
913

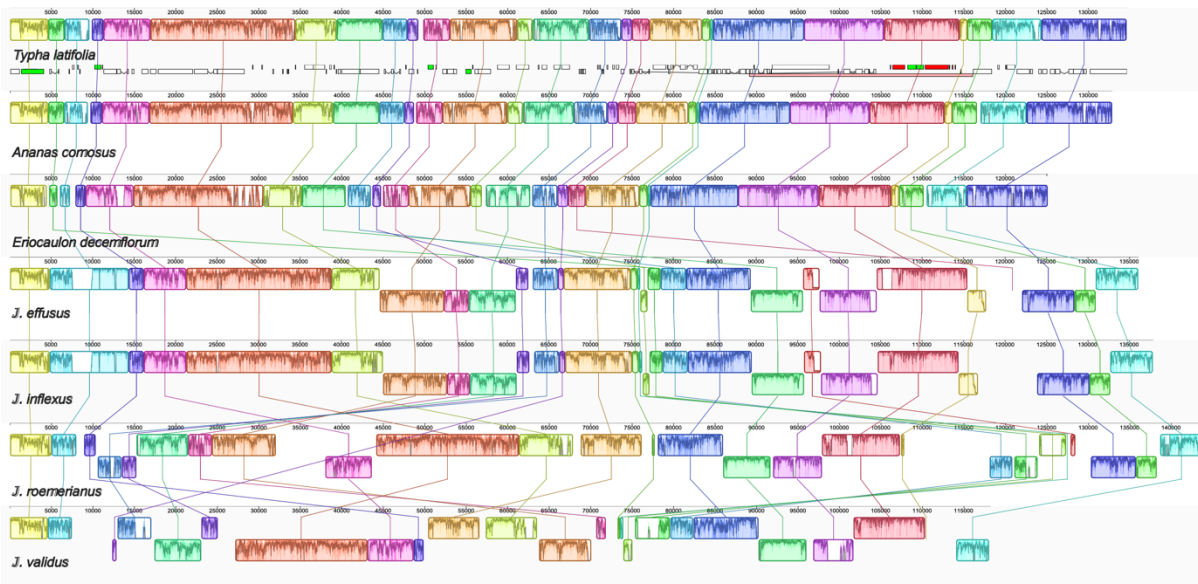

914  
915 **Figure 4** Whole plastome alignment of seven Poales species, including four newly assembly  
916 *Juncus* and *Typha latifolia*, *Ananas comosus*, and *Eriocaulon decemflorum*. The local  
917 colinear blocks (LCBs) were identified by progressiveMauve with *Typha* plastome as the  
918 reference. The corresponding LCBs among seven plastomes are shaded and connected with a  
919 line of the same color. LCBs that are flipped indicate inversions. Numbers on the upper x-  
920 axis are genome map coordinates in basepairs (bp).
